# North American Vegetable Pests: The Pattern of Invasion

Increased concern over invasion by high-profile and damaging insects requires the answers to questions about the origin of pests, period of invasion, taxa, feeding behavior, damage frequency, and the influence of crop characteristics on pest species richness.

*John L. Capinera*

**T**he successful establishment in North America of invading pests is not a new phenomenon. Since the earliest arrival of European explorers and colonists, pests of plants have accompanied movement of people, food, and plant materials to the "New World." The long sea voyage during the initial stages of colonization likely inhibited extensive transport of many short-lived pests. Up until 1800, only about 36 species of insects invaded the United States (Simberloff 1986). However, by the late 1800s not only was the speed of transport greatly increased, but transport of living plant material (and associated pests) was commonplace.

Sailer (1978, 1983) analyzed the invasion of the United States by arthropods. He reported that initially the invaders (immigrants) consisted mostly of Coleoptera, which arrived principally in ship ballast. The dominance by beetles decreased as more Lepidoptera and then Homoptera invaded, often in association with living plant material. The rate of invasion increased greatly after the 1860s as international commerce expanded. Sailer also noted that there was a slight reduction in the rate of invasion commencing in the 1920s as the Plant Quarantine Act of 1912 was implemented.

Invasion by high-profile and damaging species in recent years has increased the awareness and concern by the scientific community, government, and the general public over invading species (U.S. Congress 1993, Simberloff et al. 1997, Sakai et al. 2001). The pattern of invasion is poorly documented, despite heightened concern, and many questions remain. Has the increase in international commerce and tourism in recent years resulted in higher rates of invasion and establishment of pests? Are we at greater risk from certain types of pests, or from certain sources? Are certain taxa of pests more likely to invade and establish successfully, and are all crops equally at risk? Here I address these questions and present a comparative analysis of indigenous (na-

tive) and nonindigenous (invader, adventive, exotic) pests of vegetable crops in the United States and Canada.

## Analysis

To determine the origin and biological characteristics of vegetable pests, I reviewed the original scientific literature of over 330 pests known to feed on vegetable crops (Capinera 2001 and references therein), and compiled data on pest origin, period of introduction, host range, portion of plant damaged, and damage frequency. In most cases the literature contains reference to the likely source of these pests (126 of 135 invaders). However, for some cosmopolitan pests or poorly studied organisms the source is unknown or uncertain. Similarly, the period of detection in the United States and Canada varies from precise to unknown, with knowledge of the period of establishment (detection) limited to 87 of the 135 invading pests. Lack of data stems mostly from the early period of settlement, but invasions since 1900 are fairly well documented.

The host range of the vegetable pests is quite well documented in the literature, although there is a tendency for species that are better studied to have longer lists of hosts. Also, during periods of great abundance (outbreak), pests often use hosts that they will not normally accept. Thus, outbreak species probably have inflated host ranges. For the purposes of this analysis, I have defined a *narrow* host range to consist of consumption of vegetable plants from a single botanical family. A *moderate* host range consists of consumption of vegetable plants from two to five families, and a *wide* host range is defined as consumption of greater than five families of vegetable crops.

Damage frequency is based on the literature for each pest, as described elsewhere (Capinera 2001), and considers damage to both home gardens and commercial vegetable production. Damage frequency is designated as *rare* when there are few reports of serious injury in the literature. Damage frequency is considered *periodic* when there is general recognition that the organism is capable of

causing crop injury, but the pest does not cause loss annually, and vegetable growers do not normally take preventative measures to guard against injury. Pest damage is considered *frequent* when the potential to cause injury exists annually in either home gardens or on farms, and characterizes pests for which vegetable producers annually plan for suppressive or preventive actions. Pests are designated as capable of periodic or frequent damage if this pattern is exhibited even in a limited geographic area, because most pests have limited geographic distribution.

Designation of the site of damage is based on the scientific literature, and consists of blossom (flower); fruit (seed-containing structure); foliage; stem or vine; tuber (below-ground storage organ); and root, bulb, or germinating seed (below-ground root-related structures).

The 332 pests considered in this analysis are, in nearly all cases, individual species. However, the economic literature tends to group some pests into complexes either because they are poorly known or difficult to differentiate. Therefore, a few pests (e.g., false wireworms, Coleoptera: Elateridae; white grubs, Coleoptera: Scarabaeidae) are treated as individual pests although more than one species is involved. Also, some literature is confusing because pests originally thought to be a single species have since been differentiated into species complexes (e.g., spinach and beet leafminers, *Pegomya* spp., Diptera: Anthomyiidae; dingy cutworms, *Feltia* spp., Lepidoptera: Noctuidae). These issues are minor, however, and likely have little effect on the analysis.

The aforementioned data on pest characteristics were analyzed by 2 × 2 contingency table analysis using Fisher's exact test (Zar 1984). In the case of feeding behavior, I compared the number of species with wide host range to the number of species with narrow host range for both indigenous and nonindigenous species. For the noctuid and pyralid analysis, I also analyzed the number of species with narrow and wide host ranges for each family. For damage frequency, I compared the number of species causing damage rarely or frequently for both indigenous and nonindigenous species.

Regression analyses were conducted on area planted to major commercial vegetable crops, total crop value, and unit value in relation to the total number of pest species or number of major pest species per crop. Major pest species were those capable of "frequent" and "periodic" damage, as described previously. Correlation analyses were performed on crop acreage and crop value data, and on crop acreage and crop unit value data. All data were log-transformed prior to linear regression or correlation (Graphpad Software 1993). Such transformation linearizes curvilinear relationships, and normalizes residuals and makes them homocedastic. Although not always improving the fit of the model (Conner and McCoy 1979), this is a common practice in analysis of species-area relationships. The crops analyzed in this manner were artichoke, asparagus, bean, broccoli, cabbage, cauliflower, carrot, celery, cucumber, lettuce, melons (pri-

marily cantaloupe and honeydew), onion, pea, pepper, potato, spinach, sweet corn, sweet potato, tomato, and watermelon. Data on crop acreage and value are from Capinera (2001), and consist of summed American and Canadian values.

### Origins of Vegetable Pests

Of the 332 vegetable pests considered in this analysis, 99% were successfully classified as either indigenous (native) or nonindigenous (invaders), and 59% appeared to be indigenous to the United States or Canada (*Appendix 1*). Similarly, Pimentel (1993) estimated that 63% of major American vegetable pests are indigenous, though this figure is based on a subset of vegetable crops. It is evident that our native fauna displays considerable plasticity in acquiring new hosts. This trend has been noted previously, and we can expect the number of pests to increase with time, and especially with the area planted to each particular crop (Strong 1974, Strong et al. 1977, McCoy and Rey 1983, Capinera et al. 1984a), as indigenous species adapt to imported host plants, or crops are exposed to additional potential pests in new geographic areas. However, species accrual on introduced crops occurs most rapidly soon after plant introduction, and species richness on crops does not increase indefinitely, leveling off after fewer than 300 years if there is not an increase in crop acreage (Strong 1974). Also, it is important to note that though indigenous pests form a large assemblage, they do not necessarily cause damage frequently (see discussion of pest damage below).

Europe is the principal origin of the nonindigenous vegetable pests found in North America. About 54% are thought to have originated there, or to have arrived in North America via that region (Fig. 1). This is not surprising because the United States and Canada were colonized principally by Europeans, who introduced European crops, and possibly allowed European pest "hitchhikers" to arrive. The introduction of crops, the repeated waves of European immigration, the extensive trade between Europe and North America, and the introduction of European ornamental plants to North America all contributed to the pre-

Pest damage is considered *frequent* when the potential to cause injury exists annually in either home gardens or on farms

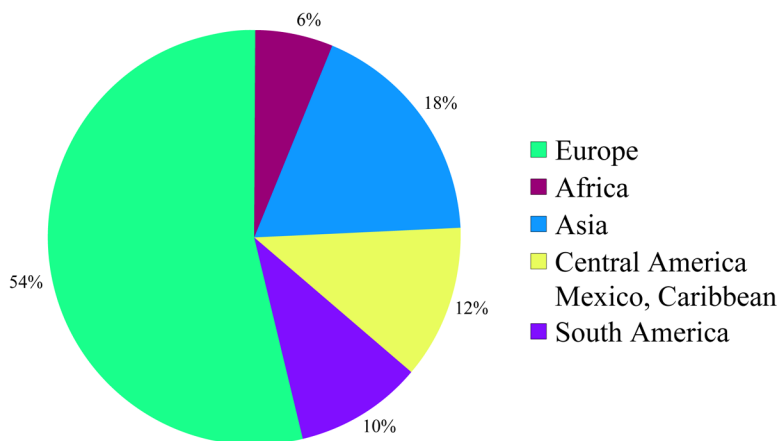

**Fig. 1.** Origins of vegetable pests ( $n = 126$ ) that successfully invaded the United States and Canada, expressed in percentage.

The invasion of large numbers of European pests is not limited to North America, as it also has occurred in Australia, New Zealand, and South Africa

ponderance of European pests. Sailer (1978) also reported that non-indigenous species came predominantly from the European region (western Palearctic), although beneficial insects introduced for biological suppression of pests also were included in his calculations. Pimentel (1993) estimated that 37% of major American pests originated in Europe, although this estimate is based on a large number of crops, not just vegetables. Lindroth (1957) provided a long list of fauna common to Europe and North America. The invasion of large numbers of European pests is not limited to North America, as it also has occurred in Australia, New Zealand, and South Africa (Simmonds and Greathead 1977). Interestingly, North America has contributed relatively few insects to Europe's pest fauna. Lindroth (1957) suggested that North America contributed few species to Europe because shipments to Europe contained heavy, raw materials that did not necessitate ballast, whereas many sailing ships traveling to North America required ballast because they carried only small cargoes of refined goods.

Less well represented are pests from South America (10%), and Central America, Mexico, and the Caribbean region (12%). We might expect that with the proximity of these regions, and the Neotropical origins of many important crops cultivated in the United States and Canada (e.g., corn, beans, squash, potato), we might have a larger contingent of pests from Latin America. However, the aforementioned values are larger estimates than were developed by Sailer (1978) for immigrant (invaders plus deliberate introductions) fauna from these regions (6% for South America, and 7% for Mexico, Central America, and the Caribbean region). Sailer suggested that environmental resistance may account for the relatively small number of Neotropical pests in North America; invaders from the Southern Hemisphere are most likely to gain access to commercial transport during the southern summer months but may arrive in the Northern Hemisphere during the inhospitable northern winter months. Evidence for this is perhaps found in the very high pest invasion rates of Hawaii, Florida, and California (Sailer 1978, Dowell and Gill 1989,

Frank and McCoy 1992), where environmental resistance is less of an issue for invaders (Sailer 1978).

Asia is well represented as a source of vegetable pests (18%), although Africa is poorly represented (6%), and Australia apparently contributed no pests to North America's vegetable pest fauna. The paucity of crops grown in North America that originate in Africa and Australia, as well as the relatively low level of commerce between North America and these continents, may account for these low figures.

### Period of Invasion

Establishment of invading vegetable pests appears to have reached a maximum in the period of 1850-1899 (Fig. 2). This corresponds to a period of more rapid transport and increased commerce between North America and the rest of the world. However, the date of invasion of a considerable number of vegetable pests (36%) is uncertain. It is likely that many pests with unknown dates of invasion were established before 1800 or early in the 1800s, so the apparent increase in rate of invasion shown in Fig. 2 may be exaggerated. However, the establishment rate data since 1900 are quite reliable, reflecting advances in both the science of entomology and government support for regulatory activities. Thus, there is good evidence that the rate of invasion of vegetable pests has declined markedly during the 20th century. There remain in Europe many important vegetable pests that have not invaded North America, so I do not think that the "species pool" of good invaders has been depleted. In Asia and South America there are even larger numbers of prospective pests, and the level of commerce and speed of transport would suggest that more pests might be introduced successfully. Thus, the quarantine procedures and eradication efforts implemented by state and federal governments are producing benefits for the United States and Canada, at least with respect to vegetable pests.

The decreasing rate of establishment of invading pests reported herein should not be entirely surprising. Long-term analyses of arthropod introduction rates into California (Dowell and Gill 1989) and Florida (Frank and McCoy 1992, Florida Department of Agriculture unpublished data) demonstrate no increase in establishment rate, despite massive increases in tourism and commerce between the United States and elsewhere. Those data and the data reported herein on decreased vegetable pest invasion rates are hopeful signs, but hardly signal an end to problems with invading pests. Not only are invasions continuing, but we must bear the economic burden of the cumulative effects of a 300-year period of pest invasion. In an annoying number of cases, pests that were serious threats to vegetable production 100 years ago remain as significant pests. Thus, the economic burden (costs associated with old and new pests) tends to increase as new pests establish successfully, even if the rate of introduction is diminishing and suppressive technology is improving.

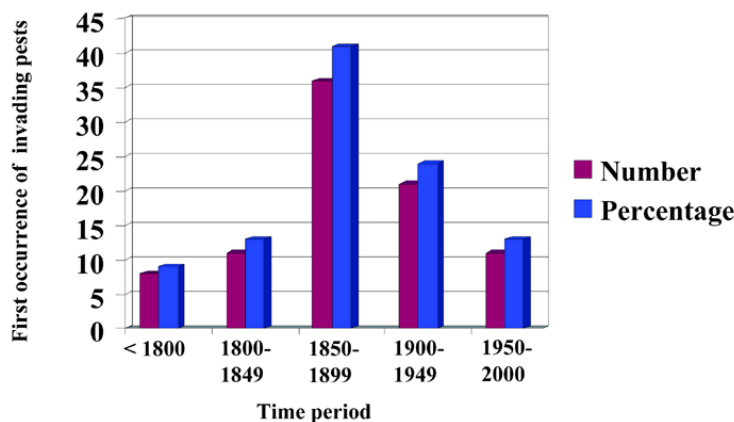

Fig. 2. Temporal pattern of invasion of United States and Canada by vegetable pests ( $n = 87$ ), expressed as number and percentage in each time period.

### Taxa of Invading Pests

The number of vegetable-feeding pests in each taxon might be expected to reflect the number of plant-feeding species in that taxon. Indeed, some of the largest groups of vegetable-feeding species are in the large plant-feeding orders Coleoptera, Lepidoptera, Heteroptera, and Homoptera. Also, the species richness of taxa containing vegetable pests largely parallels that of pests in general as documented by the Commonwealth Institute of Entomology's world-wide perspective (Simmonds and Greathead 1977). Specifically, taxa such as the order Heteroptera, family Aphididae (order Homoptera), families Pyralidae and Noctuidae (order Lepidoptera), and families Curculionidae and Scarabaeidae (order Coleoptera), which contain many pests, also are especially well represented in the North American vegetable pest compilation. There are some exceptions, however, and taxa such as the families Chrysomelidae and Elateridae (order Coleoptera), families Agromyzidae and Anthomyiidae (order Diptera), family Miridae (order Heteroptera), and family Acrididae (order Orthoptera) tend to be slightly over-represented because North American vegetable pests as compared with pests in general as compiled by the Commonwealth Institute of Entomology.

There are some marked differences in taxonomic association of vegetable pests when the abundance of invading organisms is compared with the abundance of indigenous organisms (Fig. 3). The proportion of invading Coleoptera, Lepidoptera, Heteroptera, and Orthoptera is about one-half the level observed among indigenous species, whereas Homoptera, Diptera, and Gastropoda are several-fold more abundant among invaders. The greater abundance of invading Diptera and Gastropoda is likely due to the dumping of soil ballast containing these pests in American ports during the early period of colonization when ballast was needed by sailing ships, because these organisms are commonly associated with soil. In contrast, Homoptera are excellent "hitch-hikers" on plant material, and many undoubtedly were introduced accidentally with ornamental plants (Sailer 1978). Some examples of successful invaders are shown in Fig. 4.

Association of pests into large taxa (i.e., orders or classes) is convenient, but masks some important trends. Family-level analysis suggests some important differences in biological characteristics of insects that may account for pest status. The vegetable-feeding ground beetles (Carabidae), tortoise beetles (Chrysomelidae, subfamily Cassidae), blister beetles (Meloidae), sap beetles (Nitidulidae), seed bugs (Lygaeidae), woollybears (Arctiidae), hornworms (Sphingidae), grasshoppers (Acrididae), and field crickets (Gryllidae) are exclusively indigenous species. The flea beetles (Chrysomelidae, subfamily Alticinae), wireworms (Elateridae), cutworms (Noctuidae), and plant bugs (Miridae) are predominantly indigenous. Possibly these species are not good "stow-aways," although there are other explanations. The European fauna and the North American fauna are not completely equivalent, with groups such as grasshoppers (Acrididae) and wireworms (Elateridae) not particularly numerous or damaging in Europe, so there is little likelihood that they would be transported. Similarly, ground beetles (Carabidae) have been frequently transported to North America, where they successfully established (Lindroth 1957), but few species are considered to be pests. In contrast, the seed beetles (Bruchidae), mole crickets (Gryllotalpidae), and nearly all snail and slug (Gastropoda) pests are not indigenous. Invasion by seed beetles was likely unavoidable due to the dependency of early colonists on legume seeds which stored well for long periods of time. Mole crickets and slugs undoubtedly were accidentally introduced with soil ballast (Sailer 1978), though most snails were deliberately introduced as a source of food (Mead 1971). Other important taxa containing numerous invaders include the weevils (Curculionidae), white grubs (Scarabaeidae), root maggots and leaf miners (Anthomyiidae), and aphids (Aphididae). The curculionids, scarabaeids, and anthomyiids have soil-borne or cryptic stages, and aphids are difficult to detect, especially in the egg stage, so transport of these groups is understandable. Some of the more numerous plant-feeding taxa, including leaf beetles (Chrysomelidae), leaf miners (Agromyzidae), stalk borers (Pyralidae),

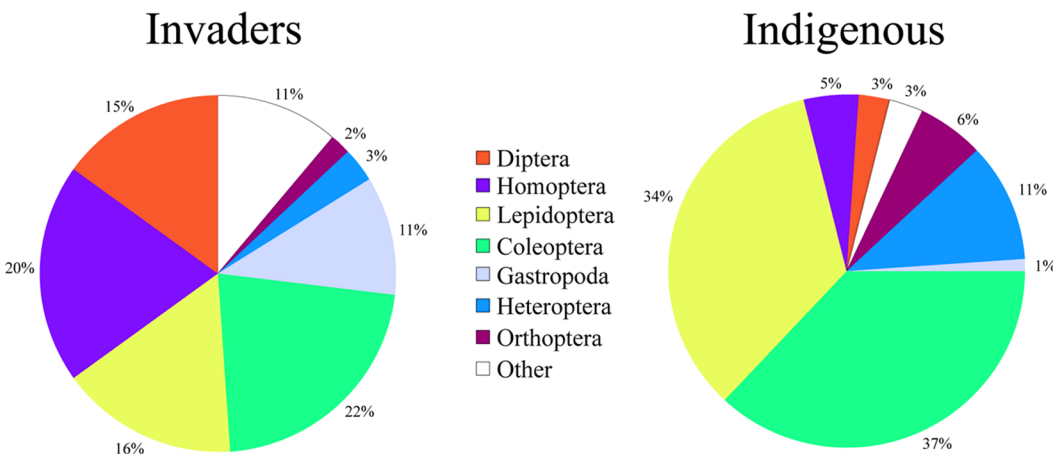

**Fig. 3.** Taxonomic distribution of invaders ( $n = 135$ ) and indigenous vegetable pests ( $n = 197$ ) expressed as percentage.

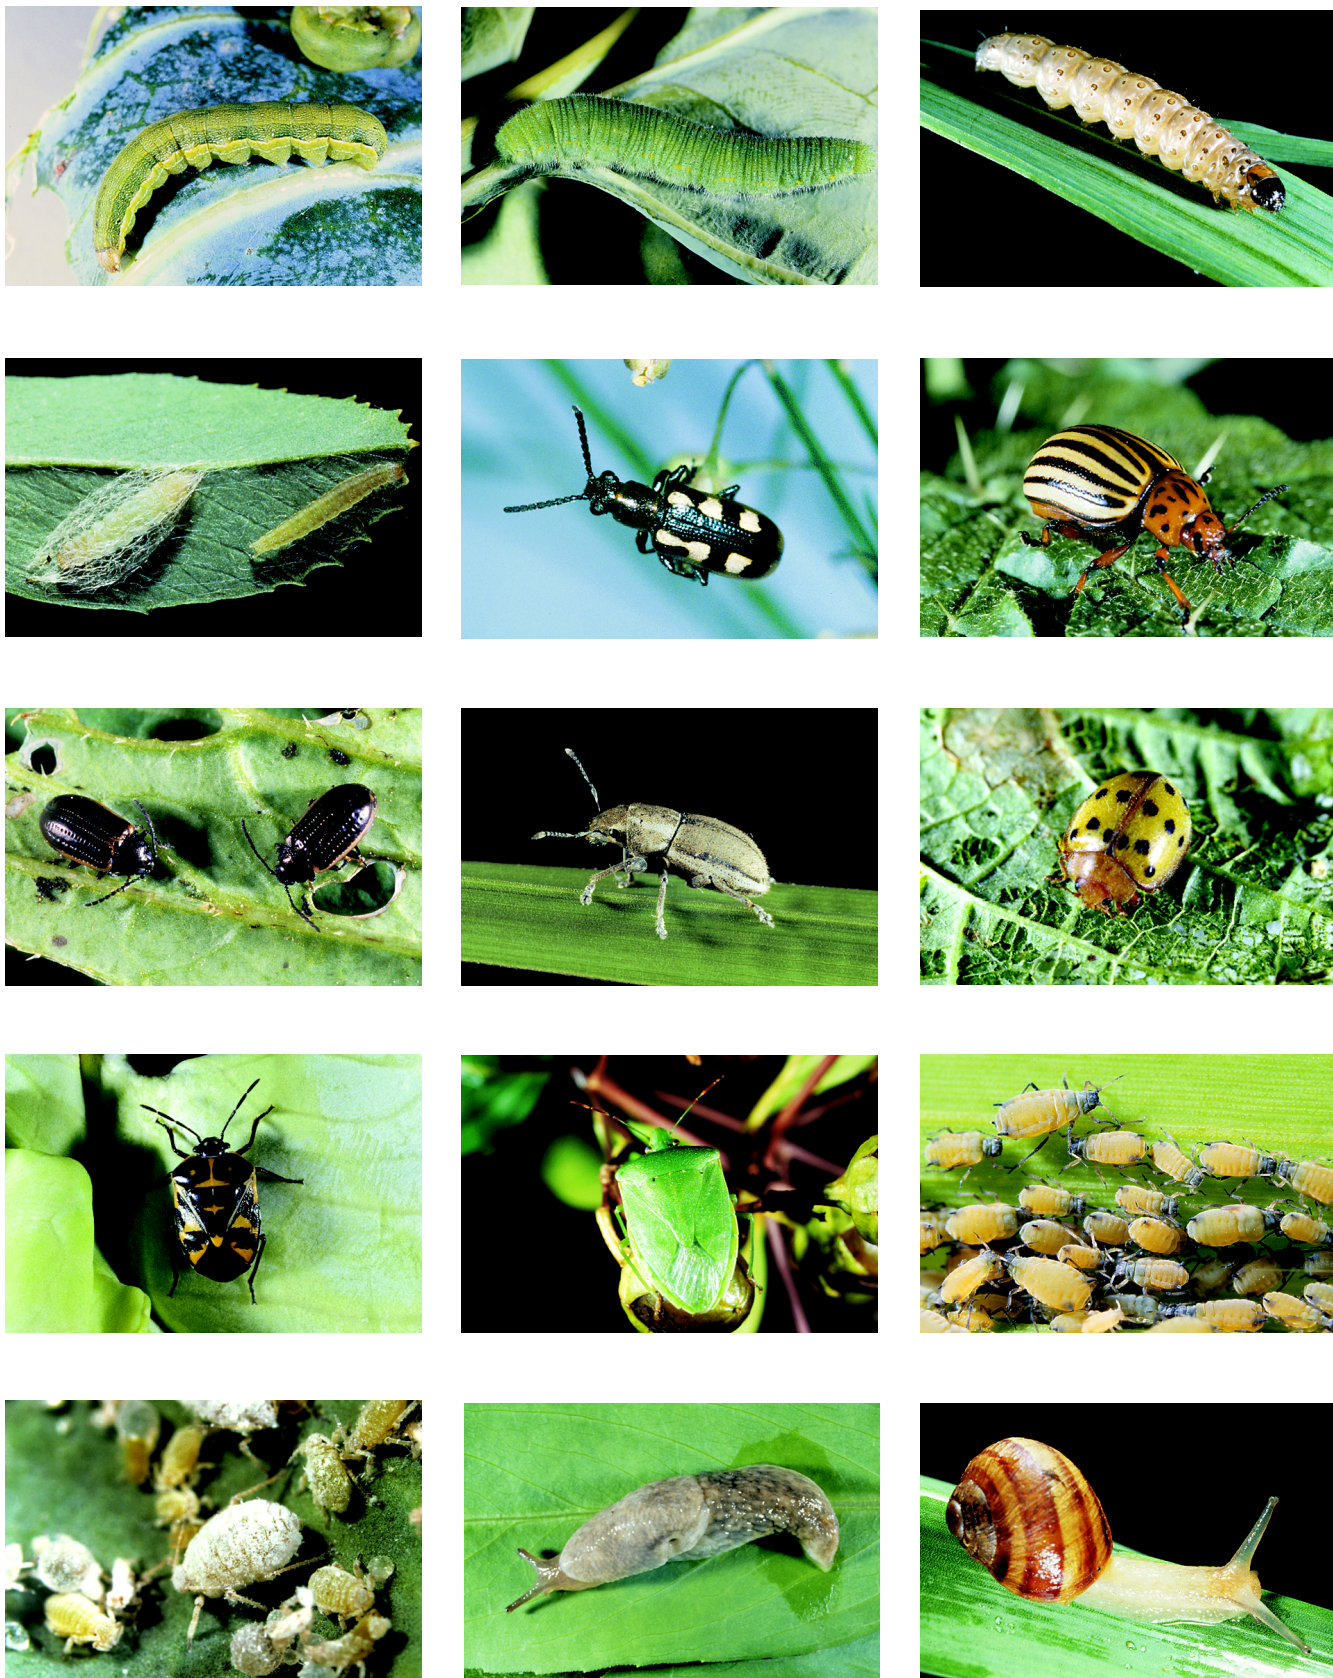

**Fig. 4.** A rogue's gallery of representative non-indigenous pests affecting North American vegetable crops. Top row (left to right): beet armyworm, imported cabbageworm, European corn borer. Second row: diamondback moth pupa and larva, asparagus beetle, Colorado potato beetle. Third row: yellowmargined leaf beetle, whitefringed beetle, Mexican bean beetle. Fourth row: harlequin bug, southern green stink bug, corn leaf aphids. Bottom row: cabbage aphids, gray garden slug, brown garden snail.

thrips (Thysanoptera), and mites (Acari) consist of both indigenous and nonindigenous species. Again, these groups have below-ground or cryptic stages.

### Feeding Behavior and Damage Frequency

Feeding behavior varies considerably among both invading and indigenous species. Some species attack only a single vegetable crop (e.g., asparagus aphid and asparagus, artichoke plume moth and artichoke, sweetpotato leaf beetle and sweet potato), others consume 20 or more crops (e.g., green peach aphid, onion thrips, two-striped grasshopper), and of course many species are intermediate in host acceptance between these extremes. Of the 332 pests evaluated, 38% were determined to have a narrow host range (a single plant family), 16% have a moderate host range (two to five plant families), and 45% have a wide host range (more than five plant families). Interestingly, the breadth of host feeding behavior is not equally distributed among the indigenous and nonindigenous species. The nonindigenous species display a greater proportion of species with a narrow host range (45%) and a lesser proportion of species with a wide host range (38%) as compared to indigenous species (34 and 50%, respectively) (significant by Fisher's exact test:  $P = 0.027$ ). This trend is even more marked if only the arthropods are included (the gastropods are excluded); in the absence of gastropods the invaders' host range is 50% narrow and 31% wide, and the indigenous species' host range is 34% narrow and 50% wide (Fisher's exact test:  $P < 0.001$ ). From an evolutionary perspective, it makes sense that the indigenous species having a wide host range would be the ones associated with introduced crops, whereas the invading species that are most intimately associated with introduced crops (i.e., those with a narrow host range) would most likely accompany the introduced crops. This is perhaps best seen in the families Noctuidae and Pyralidae (both order Lepidoptera). Noctuid pests of vegetables are overwhelmingly indigenous, and only 5% are classified as possessing a narrow host range, whereas 70% are classified as having a wide host range. The vegetable pests of the family Pyralidae, however, are mixed in origin, and 71% are classified as possessing a narrow host range, whereas 21% have a wide host range. Thus, the noctuid vegetable pests, which are overwhelmingly indigenous, have a broad host range, and the pyralid vegetable pests, which include a great number of nonindigenous species, are predominantly narrow in host range (significantly different by Fisher's exact test:  $P < 0.001$ ). A study of adoption of conifer hosts by British moths (Fraser and Lawton 1994) showed a similar trend: species adopting new hosts had wider host ranges. North America possesses close relatives to nearly all the introduced crops among its indigenous flora, so it might seem equally likely that specialist herbivores associated with the native plants would adapt to the introduced crops. Indeed, we see the results of specialists expanding

their host range to include introduced host plants, but even more important is the invasion by specialist herbivores which are co-evolved and are pre-adapted to accept the foreign crops.

Damage frequency varies significantly among indigenous and nonindigenous species, with invaders considered to be damaging far more frequently (significantly different by Fisher's exact test:  $P < 0.001$ ). Among nonindigenous species, 50% were classified as causing damage rarely and 22% were classified as causing damage frequently. In contrast, among indigenous species, 65% were classified as causing damage rarely and only 9% as causing damage frequently. Thus, the specialist herbivores that typify invasive pests are well adapted for their host plants, and more damaging than the generalist indigenous species that have expanded their host range to include the introduced vegetable crops. There seems to be no relationship between the site of attack, or the number of sites attacked on a plant, and the origin of pests or their frequency of damage (*Appendix 1*).

Invading organisms are often thought to be particularly damaging because they lack the normal complement of natural enemies found in their native land. This is largely true, and substantiated by the decreased abundance and economic impact of some invaders following introduction of predators and parasitoids (Sailer 1978). However, the differing feeding behavior/host range of invaders relative to indigenous species is perhaps a significant element accounting for frequent and damaging outbreaks of nonindigenous species in North America. Pre-adapted specialist species, with relatively narrow host ranges, are especially well equipped to exploit crop resources when they are inadvertently introduced. More than 99% of the cultivated acreage in North America is planted to introduced crops, and seems to be unusually vulnerable to invading species (Kim 1993).

The importance of herbivore pre-adaptation to the host, or selective feeding behavior, is not generally recognized as an important element leading to frequent damage by invading species, though intuitively most economic entomologists would acknowledge its importance. For example, in a review of the ecological basis for pest problems, Pimentel (1977) listed numerous factors that account for pest status, including introduction into new areas without their natural enemies, change in climatic regions, monoculture, plant spacing, continuous culture, plant nutrition, timing of planting, and pesticide-induced changes in plant physiology. Though these all are valid elements contributing to the suitability of host plants to pests, these characteristics are all extrinsic to the pest, representing climatic and host-plant attributes only. However, in Pimentel's discussion of genetic diversity, where the notion of co-evolution is presented, one begins to appreciate the significance of plant-insect relationships, including elements intrinsic to the insects, such as selective feeding behavior. In a later treatment (Pimentel 1993), food is suggested as the number one factor in determining success of

Invading organisms are often thought to be particularly damaging because they lack the normal complement of natural enemies found in their native land.

invading insects, but again pre-adaptation or feeding specialization is not explicitly stated as a major factor determining success of, or frequency of damage by, invaders. Similarly, Sakai et al. (2001) reviewed the life history characteristics of invasive species, and although they noted the significance of pre-adaptation to climatic conditions, they failed to note the importance of diet specialization. The lack of data on pest origins, severity, and other factors perhaps accounts for the under-appreciation of pre-adaptation or selective feeding behavior as a key element in determining damage by introduced pests. However, in the biological control community the importance of selectivity, or narrow host range due to pre-adaptation, is widely recognized as an important element in determining the potential effectiveness (i.e., host location and exploitation) of introduced biological control agents (Huffaker et al. 1971, Zwolfer et al. 1976). There is no reason to expect that the pattern of host-parasite relationships would be any different in crop plant-crop pest relationships than it would be in weed-biological control agent relationships or insect-parasitoid relationships. The ecological community also has a good appreciation of pre-adaptation, identifying host plant taxonomic affinity as an element in host adoption by insect herbivores, and hence in species richness (Connor et al. 1980, Neuvonen and Niemela 1983, Capinera et al. 1984b).

### **Influence of Crop Characteristics on Pest Species Richness**

North American vegetable crops differ greatly in the extent of commercial acreage, crop value, and the number of pests associated with each crop (Capinera 2001). Mean area ( $\pm$ SD) planted to vegetable crops averaged 108,000 ha ( $\pm$ 150,720 ha) per crop, ranging from artichoke at only 3,683 ha, to potato at 662,020 ha. The mean value ( $\pm$ SD) of vegetable crops was about \$617 million ( $\pm$ 769 million) or \$7,986/ha ( $\pm$ 5,785). Correspondingly, the least valuable crop was artichoke, valued at \$67.6 million, whereas the most valuable was potato, valued at \$3,121 million. However, examination of crop unit value provided a different picture of vegetable crop worth, with pea the least valuable crop at \$1,162/ha, and celery the most valuable at \$24,340/ha. Vegetable crops averaged ( $\pm$ SD) 110 known pests/crop ( $\pm$ 36), with a mean of 39 major pests ( $\pm$ 19) per crop. Although the value and area planted to crops can vary considerably from year to year, the pest fauna should display relatively little short-term change.

Pest species richness was positively related to area planted to vegetable crops. The number of indigenous pests, nonindigenous pests, as well as indigenous plus nonindigenous pests, were significantly related to crop area. This was true for both major pests and all pests (Table 1). Richness of indigenous species was more directly related to crop area than was richness of nonindigenous species.

The positive species-area relationship is a fundamental expression of community biogeography (Strong 1979), and is well documented for insects

feeding on trees (Cornell and Washburn 1979; Claridge and Wilson 1982; MacGarvin 1982; Stevens 1986; Leather 1985, 1990) and crop plants (McCoy and Rey 1983; Capinera et al. 1984a, 1984b). However, there is continuing debate concerning the basis for the greater herbivore species richness associated with more extensive host area or range. Three general explanations have been proposed: area per se, habitat heterogeneity, and passive sampling (Connor and McCoy 1979).

The area per se explanation considers that crop area is the favorable or preferred habitat for crop pests, and that when the pests disperse into other (noncrop) areas their survival is diminished. With larger crop "islands," or more extensive plantings, dispersing insects are more likely to be retained within the crop habitat, resulting in enhanced survival and species richness. A dynamic balance is postulated between immigration and emigration/extinction, with a higher equilibrium level established on larger crop islands or on crops grown more extensively.

Habitat heterogeneity is greater when crops are planted over a more extensive area, providing for differing topological, climatological, or microhabitat differences that may favor accrual of more species of herbivores inhabiting the same crop. Similarly, crops planted more extensively cross the range limits of more insect species. In an area as extensive as North America, it is easy to find many examples of pests that are limited by climatological factors to a portion of the range inhabited by a crop. Thus, diversity of physical or biological environment rather than equilibrium biogeography is emphasized in this explanation of the species-area relationship.

The passive sampling explanation is perceived as more of a statistical artifact than a biological explanation. In this scenario, larger crop areas are thought to accumulate larger numbers of herbivores through random dispersal, leading to increased species richness. Alternatively, crops grown more extensively may be sampled more frequently or extensively, leading to greater discovery and the perception of enhanced species richness. Another aspect of the sampling explanation is that host species lists may not be accurate, reflecting collector bias.

Examination of species richness in North American vegetable crops is revealing because it allows us to dispose of some of the sampling issues effectively. The pest fauna of vegetable crops is well studied, with extent of research effort and taxonomic bias not likely to be significant impediments to determination of true host ranges. Also, if there is an entomologist-based bias, it should be reflected in relation to crop value. With an entomologist-based bias we might expect to find vegetable crops of greater value to be studied more carefully, and to have longer host lists.

Pest species richness had relatively little relationship to crop value (Table 1). The relationships between major pest species richness and total crop value were marginally significant, although when all pests were considered the relationships were not

**Table 1. Regression equations describing the relationship (log/log) of species richness (number of pests per crop) to crop area (ha), crop value (\$), and unit value (\$/ha)**

| X          | Y                       | Equation            | Residual mean square | F     | r <sup>2</sup> | P       |
|------------|-------------------------|---------------------|----------------------|-------|----------------|---------|
| Area       | Major pests, indigenous | Y = (0.38)X - 0.54  | 0.071                | 10.18 | 0.361          | 0.005** |
|            | Major pests, invaders   | Y = (0.19)X + 0.22  | 0.035                | 5.32  | 0.228          | 0.033*  |
|            | Major pests, total      | Y = (0.31)X + 0.07  | 0.039                | 11.83 | 0.396          | 0.003** |
|            | All pests, indigenous   | Y = (0.22)X + 0.78  | 0.025                | 9.63  | 0.348          | 0.006** |
|            | All pests, invaders     | Y = (0.22)X + 0.50  | 0.032                | 7.58  | 0.296          | 0.013*  |
|            | All pests, total        | Y = (0.22)X + 0.95  | 0.027                | 9.18  | 0.337          | 0.007** |
| Crop value | Major pests, indigenous | Y = (0.29)X + 0.53  | 0.094                | 3.45  | 0.161          | 0.079   |
|            | Major pests, invaders   | Y = (0.18)X + 0.67  | 0.039                | 3.09  | 0.147          | 0.094   |
|            | Major pests, total      | Y = (0.25)X + 0.90  | 0.054                | 4039  | 0.196          | 0.050*  |
|            | All pests, indigenous   | Y = (0.08)X + 1.60  | 0.038                | 0.63  | 0.034          | 0.438   |
|            | All pests, invaders     | Y = (0.19)X + 1.15  | 0.040                | 2.07  | 0.116          | 0.141   |
|            | All pests, total        | Y = (0.31)X + 1.62  | 0.036                | 2.39  | 0.117          | 0.139   |
| Unit value | Major pests, indigenous | Y = (-0.33)X + 2.54 | 0.978                | 2.56  | 0.124          | 0.127   |
|            | Major pests, invaders   | Y = (-0.19)X + 1.85 | 0.041                | 1.91  | 0.096          | 0.184   |
|            | Major pests, total      | Y = (-0.27)X + 2.55 | 0.056                | 2.87  | 0.137          | 0.107   |
|            | All pests, indigenous   | Y = (-0.23)X + 2.70 | 0.031                | 3.92  | 0.176          | 0.063   |
|            | All pests, invaders     | Y = (-0.21)X + 2.36 | 0.041                | 2.48  | 0.121          | 0.132   |
|            | All pests, total        | Y = (-0.23)X + 2.88 | 0.034                | 3.48  | 0.162          | 0.078   |

\*, significant; \*\*, highly significant

significant. The relationships of pest species richness and crop value were positive. The marginal positive relationships are likely due to the fact that, not surprisingly, crop area and value are correlated ( $r = 0.758$ ;  $P < 0.001$ ;  $n = 20$ ). Thus, pest species richness and value are auto-correlated but there is no causative basis. Conversely, when crop unit values were analyzed, there were no significant relationships between crop values and the richness of major pests, and only near significance for crop values and richness of all pests. These latter relationships were consistently negative. Crops grown extensively are less valuable, and there is a significant negative correlation ( $r = -0.506$ ;  $P = 0.023$ ;  $n = 20$ ) between crop area and unit area values. Again, auto-correlation accounts for the marginal trends observed with respect to crop unit values and species richness. In a previous study of crop pests in Colorado, I similarly found no evidence that species richness was positively correlated with crop value, and in the case of vegetable crops I found a significant negative relationship (Capinera et al. 1984a). Thus, there seems to be little evidence for entomologist-bias, allowing us to largely exclude sampling-based explanations for the species-area relationships

It is difficult to determine the relative contribution of the two remaining explanations, area per se and habitat heterogeneity, to species richness. As pointed out by Strong (1979), heterogeneity is often correlated with area. However, heterogeneity seems the most logical basis for the species-area relationship. Many crop pests, particularly specialists, are adept at locating small patches of plants, even including individual plants. Also, the vegetable crops in North America have had 200 years or more to be “located” by indigenous insect herbivores, so relationships should be fairly well de-

finer. Lastly, because of the extensive observations of vegetable crops made in North America during the last 150 years, there are few undiscovered relationships/host associations. There seems to be little evidence, therefore, to justify area per se as the basis for species richness unless higher extinction rates in smaller “patches” leads to failure of entomologists to detect colonizing species. On the other hand, habitat heterogeneity is a significant element affecting species distribution. Northern and southern latitudes differ markedly with respect to vegetable fauna, and a moisture-based longitudinal gradient also affects host associations significantly in North America. Plant species grown more extensively will undoubtedly accrue longer host lists on a continent as climatologically diverse as North America.

Crop area is not the only plant characteristic to affect species richness. The architecture or complexity of plants (Lawton 1983), taxonomic relatedness (Connor et al. 1980, Niemela and Neuvonen 1983, Kennedy and Southwood 1984), and degree of polyphagy and habitat generalism (Quinn et al. 1997) have been implicated, though these factors are usually less important than is area. In a previous analysis of crop plants grown in Colorado, I found that the plant architecture and taxonomic relatedness factors affected species richness on crop plants, but not in a consistent manner (Capinera et al. 1984a).

### Characterization of North American Vegetable Pests

Of the 332 pests considered to be damaging to vegetable crops in the United States and Canada, 59% apparently are indigenous. The invaders come principally from Europe, the source of many of our vegetable and ornamental crops, the major



source of human immigrants that populated North America, and a continuing source of tourists and trade. Latin America and Asia are secondarily important as sources of vegetable pests, though they remain significant potential sources of invaders. The rate of invasion by vegetable pests has decreased in the 20th century, though pests continue to enter North America. The regulatory processes developed to curtail the influx of exotic pests seem to have had considerable benefit.

The major plant-feeding insect orders are well represented among North American vegetable pests, principally the orders Coleoptera, Lepidoptera, Heteroptera and Homoptera. Invaders are more likely to be the orders Homoptera and Diptera, and the class Gastropoda, whereas indigenous pests are more likely to be the orders Coleoptera, Lepidoptera, Heteroptera, and Orthoptera. Among the groups that are particularly good invaders are the insect families Bruchidae, Curculionidae, and Scarabaeidae (all order Coleoptera), family Pyralidae (order Lepidoptera), family Anthomyiidae (order Diptera), family Aphididae (order Homoptera), family Gryllotalpidae (order Orthoptera), and the class Gastropoda. We seem to be at greatest risk from pests that have soil-dwelling or cryptic stages, as these pests gain entry frequently. North American vegetable crops have numerous pests, averaging 110 per crop, and with a mean of 39 major pests per crop.

Invading vegetable pests are more likely to have a narrow host range (a single vegetable plant family) whereas indigenous pests are more likely to have a wide host range (more than five plant families). Nonindigenous pests are more likely to be classified as serious pests than are indigenous pests. Thus, preadaptation to feed on imported vegetable crops is identified as a major factor in attainment of pest status. Species richness of both indigenous and nonindigenous vegetable crop pests is positively related to the extent of commercial crop production in North America, so the crops most at risk of acquiring new pests are those grown most extensively. Although economics usually determines whether or not an insect is considered to be serious pest, crop values do not affect our perception of pest species richness.

### Acknowledgments

This research was supported by the Florida Agricultural Experiment Station, and approved for publication as Journal Series No. R-08132. J. H. Frank, R. McSorley, and J. R. Rey kindly provided useful reviews of the manuscript.

### References Cited

- Capinera, J. L. 2001. Handbook of vegetable pests. Academic, New York.
- Capinera, J. L., D. C. Thompson, and C. S. Hollingsworth. 1984a. Taxonomic and ecological correlates of crop pests in Colorado. *Environ. Entomol.* 13: 202-206.
- Capinera, J. L., C. S. Hollingsworth, D. C. Thompson, and S. L. Blue. 1984b. Ecological correlates of pest

species richness on crop plants. *Prot. Ecol.* 6: 287-297.

- Claridge, M. F., and M. R. Wilson. 1982. Insect herbivore guilds and species-area relationships: leafminers on British trees. *Ecol. Entomol.* 7: 19-30.
- Connor, E. F., and E. D. McCoy. 1979. The statistics and biology of the species-area relationship. *Am. Nat.* 113: 791-833.
- Connor, E. F., S. H. Faeth, D. Simberloff, and P. A. Opler. 1980. Taxonomic isolation and the accumulation of herbivorous insects: a comparison of introduced and native trees. *Ecol. Entomol.* 5: 205-211.
- Cornell, H. V., and J. O. Washburn. 1979. Evolution of the richness-area correlation for cynipid gall wasps on oak trees: a comparison of two geographic areas. *Evolution* 33: 257-274.
- Dowell, R. V., and R. Gill. 1989. Exotic invertebrates and their effects on California. *Pan-Pac. Entomol.* 65: 132-145.
- Frank, J.H. and E.D. McCoy. 1992. The immigration of insects to Florida, with a tabulation of records published since 1970. *Fla. Entomol.* 75: 1-28.
- Fraser, S. M., and J. H. Lawton. 1994. Host range expansion by British moths onto introduced conifers. *Ecol. Entomol.* 127-137.
- Graphpad Software. 1993. InStat Biostatistics, San Diego, CA
- Huffaker, C. B., P. S. Messenger, and P. DeBach. 1971. The natural enemy component in natural control and the theory of biological control, pp. 16-67. *In* C. B. Huffaker (ed.), *Biological control*. Plenum, New York.
- Kennedy, C.E.J., and T.R.E. Southwood. 1984. The number of species of insects associated with British trees: a re-analysis. *J. Anim. Ecol.* 53:455-478.
- Kim, K. C. 1993. Insect pests and evolution, pp. 3-25. *In* K. C. Kim and B. A. McPherson (eds.), *Evolution of insect pests: patterns of variation*. Wiley, New York.
- Lawton, J. H. 1983. Plant architecture and the diversity of phytophagous insects. *Annu. Rev. Entomol.* 28: 23-39.
- Leather, S. R. 1985. Does the bird cherry have its 'fair share' of insect pests? An appraisal of the species-area relationships of the phytophagous insects associated with British *Prunus* species. *Ecol. Entomol.* 10: 43-56.
- Leather, S. R. 1990. The analysis of species-area relationships, with particular reference to macrolepidoptera on Rosaceae: how important is insect data-set quality? *Entomologist* 109:8-16.
- Lindroth, C. H. 1957. The faunal connections between Europe and North America. Wiley, New York.
- MacGarvin, M. 1982. Species-area relationships of insects on host plants: herbivores on rosebay willowherb. *J. Anim. Ecol.* 51: 207-223.
- McCoy, E. D., and J. R. Rey. 1983. The biogeography of herbivorous arthropods: species accrual on tropical crops. *Ecol. Entomol.* 8: 305-313.
- Mead, A. R. 1971. Helicid land molluscs introduced into North America. *The Biol.* 53: 104-111.
- Niemela, P., and S. Neuvonen. 1983. Species richness of herbivores on hosts: How robust are patterns revealed by analyzing published host plant lists? *Ann. Entomol. Fenn.* 49: 95-99.
- Neuvonen, S., and P. Niemela. 1983. Species richness and faunal similarity of arboreal insect herbivores. *Oikos* 40: 452-459.

- Pimentel, D.** 1977. The ecological basis of insect pest, pathogen and weed problems, pp. 3-3i. *In* J. M. Cherrett and G. R. Sagar (eds.), *Origins of pest, parasite, disease and weed problems*. British Ecological Society Symposium 18. Blackwell, Oxford.
- Pimentel, D.** 1993. Habitat factors in new pest invasions, pp. 165-181. *In* K. C. Kim and B. A. McPherson (eds.), *Evolution of insect pests: patterns of variation*. Wiley, New York.
- Quinn, R. M., K. J. Gaston, T. M. Blackburn, and B. C. Eversham.** 1997. Abundance-range size relationships of macrolepidoptera in Britain: the effects of taxonomy and life history variables. *Ecol. Entomol.* 22: 453-461.
- Sailer, R. I.** 1978. Our immigrant insect fauna. *Bull. Entomol. Soc. Am.* 24: 3-11.
- Sailer, R. I.** 1983. History of insect introductions, pp. 15-38. *In* C. L. Wilson and C. L. Graham (eds.), *Exotic plant pests and North American agriculture*. Academic, New York.
- Sakai, A. K., F. W. Allendorf, J. S. Holt, D. M. Lodge, J. Molofsky, K. With, S. Baughman, R. J. Cabin, J. E. Cohen, N. C. Ellstrand, D. E. McCauley, P. O'Neil, I. M. Parker, J. N. Thomson, and S. G. Weller.** 2001. The population biology of invasive species. *Annu. Rev. Ecol. Syst.* 32:305-32.
- Simberloff, D.** 1986. Introduced insects: a biogeographic and systematic perspective, pp. 3-26. *In* H. A. Mooney and J. A. Drake (eds.), *Ecology and biological invasions of North America and Hawaii*. Ecological Studies, vol. 58. Springer, New York.
- Simberloff, D., D. C. Schmitz, and T. C. Brown (ed.).** 1997. *Strangers in paradise. Impact and management of nonindigenous species in Florida*. Island Press, Washington, DC.
- Simmonds, F. J., and D. J. Greathead.** 1977. Introductions and pest and weed problems, pp. 109-124. *In* J. L. Cherrett and G. R. Sager (eds.), *Origins of pest, parasite, disease, and weed problems*. British Ecological Society Symposium 18. Blackwell, Oxford.
- Stevens, G. C.** 1986. Dissection of the species-area relationship among wood-boring insects and their host plants. *Am. Nat.* 128: 34-46.
- Strong, D. R.** 1974. Rapid asymptotic species accumulation in phytophagous insect communities: the pests of cacao. *Science* 185: 1064-1066.
- Strong, D. R.** 1979. Biogeographic dynamics of insect-host plant communities. *Annu. Rev. Entomol.* 24: 89-119.
- Strong, D.R., E. P. McCoy, and J. R. Rey.** 1977. Time and the number of herbivore species: the pests of sugarcane. *Ecology* 58: 167-175.
- U.S. Congress, Office of Technology Assessment.** 1993. *Harmful non-indigenous species in the United States*. OTA-F.565. U.S. Government Printing Office, Washington, DC.
- Zar, J. H.** 1984. *Biostatistical analysis*, 2nd ed. Prentice-Hall, Englewood Cliffs, NJ.
- Zwölfer, H., M. A. Glani, and V. P. Rao.** 1976. Foreign exploration and importation of natural enemies, pp. 189-207. *In* C. B. Huffaker and P. S. Messenger (eds.), *Theory and practice of biological control*. Academic, New York.

**John Capinera** is Professor of Entomology and Chairman of the Entomology and Nematology Department at the University of Florida, Gainesville FL (jlcap@mail.ifas.ufl.edu). Since his graduate school days he has had an interest in vegetable pests, and recently authored a new reference, *Handbook of Vegetable Pests* (Academic 2001), a comprehensive review of pests affecting vegetable crops in the United States and Canada. He moved to Florida in 1987, where he gained a new appreciation for invasive insects, as this state is "blessed" with the establishment of about 12 new insects annually. John's other favorite research topic is grasshoppers, and he and his students recently published a new book, *Grasshoppers of Florida* (University Press of Florida 2001). 

## Appendix 1. Insects and other invertebrate pests affecting vegetable crops in the United States and Canada

|                                                                        | Status  | Origin                             | Host range | Period of detection | Damage frequency | Site damaged            |
|------------------------------------------------------------------------|---------|------------------------------------|------------|---------------------|------------------|-------------------------|
| <b>Order Coleoptera - beetles, weevils, white grubs, and wireworms</b> |         |                                    |            |                     |                  |                         |
| <b>Family Bruchidae - seed beetles and weevils</b>                     |         |                                    |            |                     |                  |                         |
| <i>Acanthoscelides obtectus</i> (Say), bean weevil                     | Invader | Central America, Mexico, Caribbean | Narrow     | 1800-1850           | Rare             | Fruit                   |
| <i>Bruchus pisorum</i> (L.), pea weevil                                | Invader | Africa                             | Narrow     | Before 1800         | Rare             | Fruit                   |
| <i>Bruchus rufimanus</i> Boheman, broadbean weevil                     | Invader | Asia                               | Narrow     | 1850-1900           | Rare             | Fruit                   |
| <i>Callosobruchus chinensis</i> (L.), southern cowpea weevil           | Invader | Africa                             | Narrow     | ?                   | Rare             | Fruit                   |
| <i>Callosobruchus maculatus</i> (F.), cowpea weevil                    | Invader | Africa                             | Narrow     | 1800-1850           | Rare             | Fruit                   |
| <b>Family Carabidae—ground beetles</b>                                 |         |                                    |            |                     |                  |                         |
| <i>Clivina impressifrons</i> LeConte, slender seedcorn beetle          | Native  |                                    | Narrow     |                     | Rare             | Root/seed/bulb          |
| <i>Stenolophus comma</i> (F.), seedcorn beetle                         | Native  |                                    | Narrow     |                     | Periodic         | Root/seed/bulb          |
| <i>Stenolophus lecontei</i> (Chaudoir), seedcorn beetle                | Native  |                                    | Narrow     |                     | Rare             | Root/seed/bulb          |
| <b>Family Chrysomelidae, subfamily Alticinae - flea beetles</b>        |         |                                    |            |                     |                  |                         |
| <i>Chaetocnema confinis</i> Crotch, sweetpotato flea beetle            | Native  |                                    | Moderate   |                     | Rare             | Foliage, root/seed/bulb |

Appendix continued on next page

Appendix 1. (continued)

|                                                                                    | Status  | Origin                             | Host range | Period of detection | Damage frequency | Site damaged                            |
|------------------------------------------------------------------------------------|---------|------------------------------------|------------|---------------------|------------------|-----------------------------------------|
| <b>Order Coleoptera - beetles, weevils, white grubs, and wireworms (continued)</b> |         |                                    |            |                     |                  |                                         |
| <i>Chaetocnema denticulata</i> (Illiger), toothed flea beetle                      | Native  |                                    | Narrow     |                     | Rare             | Foliage                                 |
| <i>Chaetocnema ectypa</i> Horn, desert corn flea beetle                            | Native  |                                    | Moderate   |                     | Rare             | Foliage, root/seed/bulb                 |
| <i>Chaetocnema pulicaria</i> Melsheimer, corn flea beetle                          | Native  |                                    | Narrow     |                     | Periodic         | Foliage                                 |
| <i>Disonycha mellicollis</i> Say, yellownecked flea beetle                         | Native  |                                    | Narrow     |                     | Rare             | Foliage                                 |
| <i>Disonycha triangularis</i> (Say), threespotted flea beetle                      | Native  |                                    | Narrow     |                     | Rare             | Foliage                                 |
| <i>Disonycha xanthomelas</i> (Dalman), spinach flea beetle                         | Native  |                                    | Narrow     |                     | Rare             | Foliage                                 |
| <i>Epitrix cucumeris</i> (Harris), potato flea beetle                              | Native  |                                    | Wide       |                     | Rare             | Foliage, tuber, root/seed/bulb          |
| <i>Epitrix fasciata</i> Blatchley, southern tobacco flea beetle                    | Invader | Central America, Mexico, Caribbean | Moderate   | ?                   | Rare             | Foliage, root/seed/bulb                 |
| <i>Epitrix fuscula</i> Crotch, eggplant flea beetle                                | Native  |                                    | Narrow     |                     | Periodic         | Foliage, tuber, root/seed/bulb          |
| <i>Epitrix hirtipennis</i> (Melsheimer), tobacco flea beetle                       | Native  |                                    | Moderate   |                     | Periodic         | Foliage, root/seed/bulb                 |
| <i>Epitrix subcrinata</i> LeConte, western potato flea beetle                      | Native  |                                    | Wide       |                     | Rare             | Foliage, tuber, root/seed/bulb          |
| <i>Epitrix tuberosa</i> Gentner, tuber flea beetle                                 | Native  |                                    | Wide       |                     | Periodic         | Foliage, tuber, root/seed/bulb          |
| <i>Phyllotreta albionica</i> LeConte, cabbage flea beetle                          | Native  |                                    | Narrow     |                     | Rare             | Foliage, root/seed/bulb                 |
| <i>Phyllotreta armoraciae</i> (Koch), horseradish flea beetle                      | Invader | Europe                             | Narrow     | 1850-1900           | Rare             | Foliage, root/seed/bulb                 |
| <i>Phyllotreta cruciferae</i> (Goeze), crucifer flea beetle                        | Invader | Europe                             | Moderate   | 1900-1950           | Frequent         | Foliage, root/seed/bulb                 |
| <i>Phyllotreta pusilla</i> Horn, western black flea beetle                         | Native  |                                    | Wide       |                     | Rare             | Foliage, root/seed/bulb                 |
| <i>Phyllotreta ramosa</i> (Crotch), western striped flea beetle                    | Native  |                                    | Narrow     |                     | Rare             | Foliage, root/seed/bulb                 |
| <i>Phyllotreta striolata</i> (F.), striped flea beetle                             | Invader | Europe                             | Narrow     | Before 1800         | Periodic         | Foliage, root/seed/bulb                 |
| <i>Phyllotreta zimmermanni</i> (Crotch), Zimmermann's flea beetle                  | Invader |                                    | Moderate   | ?                   | Rare             | Foliage                                 |
| <i>Psylliodes punctulata</i> Melsheimer, hop flea beetle                           | Native  |                                    | Wide       |                     | Rare             | Foliage                                 |
| <i>Systema blanda</i> Melsheimer, palestriped flea beetle                          | Native  |                                    | Wide       |                     | Periodic         | Foliage, root/seed/bulb                 |
| <i>Systema elongata</i> (F.), elongate flea beetle                                 | Native  |                                    | Wide       |                     | Rare             | Foliage, root/seed/bulb                 |
| <i>Systema frontalis</i> (F.), redheaded flea beetle                               | Native  |                                    | Wide       |                     | Rare             | Foliage, root/seed/bulb                 |
| <i>Systema hudsonias</i> (Förster), smartweed flea beetle                          | Native  |                                    | Wide       |                     | Rare             | Foliage, root/seed/bulb                 |
| <b>Family Chrysomelidae, subfamily Cassidinae - tortoise beetles</b>               |         |                                    |            |                     |                  |                                         |
| <i>Agroiconota bivittata</i> (Say), striped tortoise beetle                        | Native  |                                    | Narrow     |                     | Rare             | Foliage                                 |
| <i>Charidotella bicolor</i> (F.), golden tortoise beetle                           | Native  |                                    | Narrow     |                     | Rare             | Foliage                                 |
| <i>Chelymorpha cassidea</i> (L.), argus tortoise beetle                            | Native  |                                    | Narrow     |                     | Rare             | Foliage, root/seed/bulb                 |
| <i>Deloyala guttata</i> (Olivier), mottled tortoise beetle                         | Native  |                                    | Narrow     |                     | Rare             | Foliage                                 |
| <i>Gratiana pallidula</i> (Boheman), eggplant tortoise beetle                      | Native  |                                    | Narrow     |                     | Rare             | Foliage                                 |
| <i>Jonthonota nigripes</i> (Olivier), blacklegged tortoise beetle                  | Native  |                                    | Narrow     |                     | Rare             | Foliage                                 |
| <b>Family Chrysomelidae, several subfamilies - leaf beetles</b>                    |         |                                    |            |                     |                  |                                         |
| <i>Acalymma trivittatum</i> (Mannerheim), western striped cucumber beetle          | Native  |                                    | Wide       |                     | Periodic         | Blossom, fruit, foliage, root/seed/bulb |
| <i>Acalymma vittatus</i> (F.), striped cucumber beetle                             | Native  |                                    | Wide       |                     | Frequent         | Blossom, fruit, foliage, root/seed/bulb |
| <i>Cerotoma trifurcata</i> (Förster), bean leaf beetle                             | Native  |                                    | Narrow     |                     | Rare             | Foliage, root/seed/bulb                 |
| <i>Colaspis brunnea</i> (F.), grape colaspis                                       | Native  |                                    | Wide       |                     | Rare             | Foliage, root/seed/bulb                 |
| <i>Crioceris asparagi</i> (L.), asparagus beetle                                   | Invader | Europe                             | Narrow     | 1850-1900           | Periodic         | stem/vine, foliage                      |

|                                                                                 | Status  | Origin                             | Host range | Period of detection | Damage frequency | Site damaged                                   |
|---------------------------------------------------------------------------------|---------|------------------------------------|------------|---------------------|------------------|------------------------------------------------|
| <i>Crioceris duodecimpunctata</i> (L.), spotted asparagus beetle                | Invader | Europe                             | Narrow     | 1850-1900           | Periodic         | Fruit, foliage                                 |
| <i>Diabrotica balteata</i> LeConte, banded cucumber beetle                      | Native  |                                    | Wide       |                     | Periodic         | Blossom, fruit, foliage, tuber, root/seed/bulb |
| <i>Diabrotica barberi</i> Smith & Lawrence, northern corn rootworm              | Native  |                                    | Moderate   |                     | Rare             | Root/seed/bulb                                 |
| <i>Diabrotica undecimpunctata</i> Mannerheim, spotted cucumber beetle           | Native  |                                    | Wide       |                     | Frequent         | Blossom, fruit, foliage, root/seed/bulb        |
| <i>Diabrotica virgifera</i> LeConte, western corn rootworm                      | Native  |                                    | Moderate   |                     | Frequent         | Blossom, fruit, foliage, root/seed/bulb        |
| <i>Entomoscelis americana</i> Brown, red turnip beetle                          | Native  |                                    | Narrow     |                     | Rare             | Stem/vine, foliage                             |
| <i>Leptinotarsa decemlineata</i> (Say), Colorado potato beetle                  | Invader | Central America, Mexico, Caribbean | Narrow     | 1800-1850           | Frequent         | Foliage                                        |
| <i>Microtheca ochroloma</i> Stål, yellowmargined leaf beetle                    | Invader | South America                      | Wide       | 1900-1950           | Periodic         | Foliage                                        |
| <i>Typophorus nigrinus</i> (Crotch), sweetpotato leaf beetle                    | Native  |                                    | Narrow     |                     | Rare             | Stem/vine, foliage, tuber, root/seed/bulb      |
| <b>Family Curculionidae - billbugs, curculios, and weevils</b>                  |         |                                    |            |                     |                  |                                                |
| <i>Anthonomus eugenii</i> Cano, pepper weevil                                   | Invader | Central America, Mexico, Caribbean |            | 1900-1950           | Frequent         | Blossom, fruit                                 |
| <i>Ceutorhynchus assimilis</i> (Paykull), cabbage seedpod weevil                | Invader | Europe                             |            | 1900-1950           | Rare             | Fruit                                          |
| <i>Ceutorhynchus rapae</i> Gyllenhal, cabbage curculio                          | Invader | Europe                             |            | 1800-1850           | Rare             | Stem/vine, foliage                             |
| <i>Chalcodermus aeneus</i> Boheman, cowpea curculio                             | Native  |                                    |            |                     | Periodic         | Blossom                                        |
| <i>Cylas formicarius</i> (Summers), sweetpotato weevil                          | Invader | Africa                             |            | 1850-1900           | Frequent         | Foliage, tuber                                 |
| <i>Diaprepes abbreviatus</i> (L.), West Indian sugarcane rootstalk borer weevil | Invader | Central America, Mexico, Caribbean |            | 1950-present        | Rare             | tuber                                          |
| <i>Listroderes difficilis</i> Germar, vegetable weevil                          | Invader | South America                      |            | 1900-1950           | Periodic         | Foliage, root/seed/bulb                        |
| <i>Listronotus oregonensis</i> (LeConte), carrot weevil                         | Native  |                                    |            |                     | Frequent         | Stem/vine, root/seed/bulb                      |
| <i>Listronotus texanus</i> (Stockton), Texas carrot weevil                      | Native  |                                    |            |                     | Periodic         | Stem/vine, root/seed/bulb                      |
| <i>Lixus concavus</i> Say, rhubarb cuculio                                      | Native  |                                    |            |                     | Rare             | Stem/vine, foliage                             |
| <i>Naupactus</i> spp., whitefringed beetle                                      | Invader | South America                      |            | 1900-1950           | Periodic         | Foliage, tuber, root/seed/bulb                 |
| <i>Sitona lineatus</i> (L.), pea leaf weevil                                    | Invader | Europe                             |            | 1900-1950           | Periodic         | Foliage, root/seed/bulb                        |
| <i>Sphenophorus callosus</i> (Oliver), southern corn billbug                    | Native  |                                    |            |                     | Rare             | Stem/vine, root/seed/bulb                      |
| <i>Sphenophorus maidis</i> Chittenden, maize billbug                            | Native  |                                    |            |                     | Rare             | Stem/vine, root/seed/bulb                      |
| <i>Trichobaris trimotata</i> (Say), potato stalk borer                          | Native  |                                    |            |                     | Rare             | Stem/vine, foliage                             |
| <b>Family Coccinellidae - lady beetles</b>                                      |         |                                    |            |                     |                  |                                                |
| <i>Epilachna borealis</i> F., squash beetle                                     | Native  |                                    |            |                     | Rare             | Foliage                                        |
| <i>Epilachna varivestris</i> Mulsant, Mexican bean beetle                       | Invader | Central America, Mexico, Caribbean |            | Before 1800         | Frequent         | Foliage                                        |
| <b>Family Elateridae - click beetles and wireworms</b>                          |         |                                    |            |                     |                  |                                                |
| <i>Agriotes mancus</i> (Say), wheat wireworm                                    | Native  |                                    |            |                     | Rare             | Tuber, root/seed/bulb                          |
| <i>Conoderus amplicollis</i> (Gyllenhal),                                       | Invader | South America                      |            | 1900-1950           | Periodic         | Stem/vine,                                     |

Appendix continued on next page

Appendix 1. (continued)

|                                                                                               | Status  | Origin        | Host range | Period of detection | Damage frequency | Site damaged                     |
|-----------------------------------------------------------------------------------------------|---------|---------------|------------|---------------------|------------------|----------------------------------|
| <b>Order Coleoptera - beetles, weevils, white grubs, and wireworms (continued)</b>            |         |               |            |                     |                  |                                  |
| Gulf wireworm                                                                                 |         |               |            |                     |                  | tuber, root/seed/bulb            |
| <i>Conoderus falli</i> Lane, southern potato wireworm                                         | Invader | South America |            | 1900-1950           | Periodic         | Stem/vine, tuber, root/seed/bulb |
| <i>Conoderus vespertinus</i> (F.), tobacco wireworm                                           | Native  |               |            |                     | Periodic         | Stem/vine, tuber, root/seed/bulb |
| <i>Ctenicera aeripennis aeripennis</i> (Kirby), Puget Sound wireworm                          | Native  |               |            |                     | Rare             | Tuber, root/seed/bulb            |
| <i>Ctenicera aeripennis destructor</i> (Brown), prairie grain wireworm                        | Native  |               |            |                     | Rare             | Tuber, root/seed/bulb            |
| <i>Ctenicera glauca</i> (Germar), dryland wireworm                                            | Native  |               |            |                     | Rare             | Tuber, root/seed/bulb            |
| <i>Ctenicera pruina</i> (Horn), Great Basin wireworm                                          | Native  |               |            |                     | Rare             | Tuber, root/seed/bulb            |
| <i>Limonius agonus</i> (Say), eastern field wireworm                                          | Native  |               |            |                     | Periodic         | Tuber, root/seed/bulb            |
| <i>Limonius californicus</i> (Mannerheim), sugarbeet wireworm                                 | Native  |               |            |                     | Periodic         | Tuber, root/seed/bulb            |
| <i>Limonius canus</i> LeConte, Pacific Coast wireworm                                         | Native  |               |            |                     | Periodic         | Tuber, root/seed/bulb            |
| <i>Melanotus communis</i> (Gyllenhal), corn wireworm                                          | Native  |               |            |                     | Periodic         | Root/seed/bulb                   |
| <i>Melanotus longulus oregonensis</i> (LeConte), Oregon wireworm                              | Native  |               |            |                     | Rare             | Root/seed/bulb                   |
| <b>Family Meloidae - blister beetles</b>                                                      |         |               |            |                     |                  |                                  |
| <i>Epicauta immaculata</i> (Say), immaculate blister beetle                                   | Native  |               |            |                     | Rare             | Blossom, foliage                 |
| <i>Epicauta maculata</i> (Say), spotted blister beetle                                        | Native  |               |            |                     | Rare             | Blossom, foliage                 |
| <i>Epicauta pennsylvanica</i> (De Geer), black blister beetle                                 | Native  |               |            |                     | Periodic         | Blossom, foliage                 |
| <i>Epicauta vittata</i> (F.), striped blister beetle                                          | Native  |               |            |                     | Periodic         | Blossom, foliage                 |
| <b>Family Nitidulidae - sap beetles</b>                                                       |         |               |            |                     |                  |                                  |
| <i>Carpophilus lugubris</i> Murray, dusky sap beetle                                          | Native  |               |            |                     | Rare             | Fruit                            |
| <i>Glischrochilus quadrisignatus</i> (Say), fourspotted sap beetle                            | Native  |               |            |                     | Periodic         | Fruit                            |
| <b>Family Scarabaeidae - scarab beetles and white grubs</b>                                   |         |               |            |                     |                  |                                  |
| <i>Adoretus sinicus</i> Burmeister, Chinese rose beetle                                       | Invader | Asia          |            | 1850-1900           | Rare             | Foliage                          |
| <i>Anomala orientalis</i> Waterhouse, oriental beetle                                         | Invader | Asia          |            | 1900-1950           | Rare             | Foliage, root/seed/bulb          |
| <i>Bothynus gibbosus</i> (De Geer), carrot beetle                                             | Native  |               |            |                     | Rare             | Root/seed/bulb                   |
| <i>Cotinis nitida</i> (L.), green June beetle                                                 | Native  |               |            |                     | Rare             | Foliage, root/seed/bulb          |
| <i>Macrodactylus subspinosus</i> (F.), rose chafer                                            | Native  |               |            |                     | Rare             | Blossom, fruit, foliage          |
| <i>Macrodactylus uniformis</i> Horn, western rose chafer                                      | Native  |               |            |                     | Rare             | Blossom, fruit, foliage          |
| <i>Maladera castanea</i> (Arrow), Asiatic garden beetle                                       | Invader | Asia          |            | 1900-1950           | Rare             | Foliage, root/seed/bulb          |
| <i>Phyllophaga</i> and others, white grubs                                                    | Native  |               |            |                     | Periodic         | Root/seed/bulb                   |
| <i>Popillia japonica</i> Newman, Japanese beetle                                              | Invader | Asia          |            | 1900-1950           | Frequent         | Fruit, foliage, root/seed/bulb   |
| <i>Strigoderma arboricola</i> (F.), spring rose beetle                                        | Native  |               |            |                     | Rare             | Root/seed/bulb                   |
| <b>Family Tenebrionidae - darkening beetles and false wireworms</b>                           |         |               |            |                     |                  |                                  |
| <i>Blapstinus</i> , <i>Coniontis</i> , <i>Eleodes</i> , and <i>Ulus</i> spp., false wireworms | Native  |               |            |                     | Rare             | Stem/vine, tuber, root/seed/bulb |

Downloaded from https://academic.oup.com/ae/article/48/1/20/2474628 by guest on 24 April 2024

|                                                                     | Status   | Origin                             | Host range | Period of detection | Damage frequency | Site damaged                       |
|---------------------------------------------------------------------|----------|------------------------------------|------------|---------------------|------------------|------------------------------------|
| <b>Order Dermaptera - Earwigs</b>                                   |          |                                    |            |                     |                  |                                    |
| <i>Euborellia annulipes</i> (Lucas), ringlegged earwig              | Invader  | Europe                             |            | 1900-1950           | Periodic         | Fruit, foliage                     |
| <i>Forficula auricularia</i> L., European earwig                    | Invader  | Europe                             |            | 1850-1900           | Rare             | Foliage, tuber, root/seed/bulb     |
| <b>Order Diptera - Flies and Maggots</b>                            |          |                                    |            |                     |                  |                                    |
| <b>Family Agromyzidae - leafminer flies</b>                         |          |                                    |            |                     |                  |                                    |
| <i>Agromyza parvicornis</i> Loew, corn blotch leafminer             | Native   |                                    |            |                     | Rare             | Foliage                            |
| <i>Liriomyza brassicae</i> (Riley), cabbage leafminer               | Invader  | ?                                  |            | ?                   | Rare             | Foliage                            |
| <i>Liriomyza huidobrensis</i> (Blanchard), pea leafminer            | Invader? | South America                      |            | ?                   | Periodic         | Foliage                            |
| <i>Liriomyza sativae</i> Blanchard, vegetable leafminer             | Invader? | South America                      |            | ?                   | Rare             | Foliage                            |
| <i>Liriomyza trifolii</i> (Burgess), American serpentine leafminer  | Native   |                                    |            |                     | Periodic         | Foliage                            |
| <i>Ophiomyia simplex</i> (Loew), asparagus miner                    | Invader  | Europe                             |            | 1850-1900           | Rare             | Stem/vine                          |
| <b>Family Anthomyiidae - root and seed maggots, leafminer flies</b> |          |                                    |            |                     |                  |                                    |
| <i>Delia antiqua</i> (Meigen), onion maggot                         | Invader  | Europe                             |            | Before 1800         | Frequent         | Stem/vine, root/seed/bulb          |
| <i>Delia floralis</i> (Fallén), turnip maggot                       | Invader? | Europe                             |            | ?                   | Periodic         | Root/seed/bulb                     |
| <i>Delia florilega</i> (Zetterstedt), bean seed maggot              | Invader  | Europe                             |            | ?                   | Rare             | Root/seed/bulb                     |
| <i>Delia planipalpis</i> (Stein), radish root maggot                | Native   |                                    |            |                     | Rare             | Root/seed/bulb                     |
| <i>Delia platura</i> (Meigen), seedcorn maggot                      | Invader  | Europe                             |            | 1850-1900           | Periodic         | Root/seed/bulb                     |
| <i>Delia radicum</i> (L.), cabbage maggot                           | Invader  | Europe                             |            | 1800-1850           | Frequent         | Stem/vine, root/seed/bulb          |
| <i>Pegomya betae</i> Curtis, beet leafminer                         | Invader  | Europe                             |            | 1800-1850           | Frequent         | Foliage                            |
| <i>Pegomya hyoscyami</i> (Panzer), spinach leafminer                | Invader  | Europe                             |            | 1800-1850           | Frequent         | Foliage                            |
| <b>Family Drosophilidae - pomace flies</b>                          |          |                                    |            |                     |                  |                                    |
| <i>Drosophila</i> spp., small fruit flies                           | Invader? | South America                      |            | ?                   | Rare             | Fruit                              |
| <b>Family Otididae - picturewing flies</b>                          |          |                                    |            |                     |                  |                                    |
| <i>Euxesta stigmatias</i> Loew, cornsilk fly                        | Invader  | Central America, Mexico, Caribbean |            | ?                   | Periodic         | Fruit                              |
| <i>Tetanops myopaeformis</i> (Roeder), sugarbeet root maggot        | Native   |                                    |            |                     | Rare             | Root/seed/bulb                     |
| <b>Family Psilidae - rust flies</b>                                 |          |                                    |            |                     |                  |                                    |
| <i>Psila rosae</i> (F.), carrot rust fly                            | Invader  | Europe                             |            | 1850-1900           | Frequent         | Root/seed/bulb                     |
| <b>Family Syrphidae - flower and bulb flies</b>                     |          |                                    |            |                     |                  |                                    |
| <i>Eumerus strigatus</i> (Fallén), onion bulb fly                   | Invader  | Europe                             |            | 1850-1900           | Rare             | Root/seed/bulb                     |
| <i>Eumerus tuberculatus</i> Rondani, lesser bulb fly                | Invader  | Europe                             |            | 1850-1900           | Rare             | Root/seed/bulb                     |
| <b>Family Tephritidae - fruit flies</b>                             |          |                                    |            |                     |                  |                                    |
| <i>Bactrocera cucurbitae</i> Coquillett, melon fly                  | Invader  | Asia                               |            | 1850-1900           | Frequent         | Blossom, fruit, stem/vine          |
| <i>Bactrocera dorsalis</i> Hendel, oriental fruit fly               | Invader  | Asia                               |            | 1900-1950           | Frequent         | Fruit                              |
| <i>Euleia fratria</i> (Loew), parsnip leafminer                     | Native   |                                    |            |                     | Rare             | Foliage                            |
| <i>Zonosemata electa</i> (Say), pepper maggot                       | Native   |                                    |            |                     | Periodic         | Fruit                              |
| <b>Family Tipulidae - crane flies</b>                               |          |                                    |            |                     |                  |                                    |
| <i>Tipula paludosa</i> Meigen, European crane fly                   | Invader  | Europe                             |            | 1950-present        |                  | Stem/vine, foliage, root/seed/bulb |
| <b>Order Heteroptera - Bugs</b>                                     |          |                                    |            |                     |                  |                                    |
| <b>Family Coreidae - squash and leaf-footed bugs</b>                |          |                                    |            |                     |                  |                                    |
| <i>Anasa armigera</i> (Say), horned squash bug                      | Native?  |                                    |            |                     | Rare             | Fruit, foliage                     |
| <i>Anasa tristis</i> (De Geer), squash bug                          | Native?  |                                    |            |                     | Frequent         | Fruit, foliage                     |

Appendix continued

## Appendix 1. (continued)

|                                                                                  | Status  | Origin                             | Host range | Period of detection | Damage frequency | Site damaged                       |
|----------------------------------------------------------------------------------|---------|------------------------------------|------------|---------------------|------------------|------------------------------------|
| <b>Order Heteroptera - Bugs (continued)</b>                                      |         |                                    |            |                     |                  |                                    |
| <i>Leptoglossus</i> spp., leaffooted bugs                                        | Native  |                                    |            |                     | Frequent         | Fruit, foliage                     |
| <b>Family Cydnidae - burrower bugs</b>                                           |         |                                    |            |                     |                  |                                    |
| <i>Pangaeus bilineatus</i> (Say), burrowing bug                                  | Native  |                                    |            |                     | Rare             | Fruit, foliage                     |
| <b>Family Lygaeidae - seed bugs</b>                                              |         |                                    |            |                     |                  |                                    |
| <i>Blissus leucopterus</i> (Say), chinch bug                                     | Native  |                                    |            |                     | Rare             | Foliage                            |
| <i>Nysius niger</i> Baker, false chinch bug                                      | Native  |                                    |            |                     | Periodic         | Foliage                            |
| <i>Nysius raphanus</i> Howard, false chinch bug                                  | Native  |                                    |            |                     | Periodic         | Foliage                            |
| <b>Family Miridae - plant bugs</b>                                               |         |                                    |            |                     |                  |                                    |
| <i>Adelphocoris lineolatus</i> (Goeze), alfalfa plant bug                        | Invader | Europe                             |            | 1900-1950           | Rare             | Blossom, foliage                   |
| <i>Adelphocoris rapidus</i> (Say), rapid plant bug                               | Native  |                                    |            |                     | Rare             | Blossom, foliage                   |
| <i>Adelphocoris superbus</i> (Uhler), superb plant bug                           | Native  |                                    |            |                     | Rare             | Blossom, foliage                   |
| <i>Halticus bractatus</i> (Say), garden fleahopper                               | Native  |                                    |            |                     | Periodic         | Foliage                            |
| <i>Lygus elisus</i> Van Duzee, pale legume bug                                   | Native  |                                    |            |                     | Rare             | Blossom, fruit, stem/vine, foliage |
| <i>Lygus hesperus</i> Knight, western tarnished plant bug                        | Native  |                                    |            |                     | Periodic         | Blossom, fruit, stem/vine, foliage |
| <i>Lygus lineolaris</i> (Palisot de Beauvois), tarnished plant bug               | Native  |                                    |            |                     | Frequent         | Blossom, fruit, stem/vine, foliage |
| <i>Orthops scutellatus</i> Uhler, carrot plant bug                               | Invader | Europe                             |            | 1900-1950           | Rare             | Blossom, fruit, foliage            |
| <b>Family Pentatomidae - stink bugs</b>                                          |         |                                    |            |                     |                  |                                    |
| <i>Acrosternum hilare</i> (Say), green stink bug                                 | Native  |                                    |            |                     | Rare             | Fruit, foliage                     |
| <i>Chlorochroa sayi</i> (Stål), Say stink bug                                    | Native  |                                    |            |                     | Rare             | Blossom, fruit, stem/vine          |
| <i>Chlorochroa uhler</i> (Stol), Uhler stink bug                                 | Native  |                                    |            |                     | Rare             | Fruit                              |
| <i>Euschistus conspersus</i> Uhler, consperse stink bug                          | Native  |                                    |            |                     | Periodic         | Blossom, fruit, stem/vine          |
| <i>Euschistus servus</i> (Say), brown stink bug                                  | Native? |                                    |            |                     | Rare             | Blossom, fruit, stem/vine          |
| <i>Euschistus variolaris</i> (Palisot de Beauvois), onespotted stink bug         | Native  |                                    |            |                     | Rare             | Blossom, fruit, foliage            |
| <i>Murgantia histrionica</i> (Hahn), harlequin bug                               | Invader | Central America, Mexico, Caribbean |            | 1850-1900           | Periodic         | Foliage                            |
| <i>Nezara viridula</i> (L.), southern green stink bug                            | Invader | Africa                             |            | Before 1800         | Frequent         | Blossom, fruit, stem/vine, tuber   |
| <b>Family Thyreocoridae - Negro bugs</b>                                         |         |                                    |            |                     |                  |                                    |
| <i>Corimelaena pulicaria</i> (Germar), little black bug                          | Native  |                                    |            |                     | Rare             | Stem/vine, foliage                 |
| <b>Family Tingidae - lace bugs</b>                                               |         |                                    |            |                     |                  |                                    |
| <i>Gargaphia solani</i> Heideman, eggplant lace bug                              | Native  |                                    |            |                     | Rare             | Foliage                            |
| <b>Order Homoptera - Aphids, Leaf- and Planthoppers, Psyllids and Whiteflies</b> |         |                                    |            |                     |                  |                                    |
| <b>Family Aleyrodidae - whiteflies</b>                                           |         |                                    |            |                     |                  |                                    |
| <i>Bemisia argentifolii</i> Bellows & Perring, silverleaf whitefly               | Invader | ?                                  |            | 1950-present        | Frequent         | Foliage                            |
| <i>Bemisia tabaci</i> (Gennadius), sweetpotato whitefly                          | Invader | ?                                  |            | 1900-1950           | Rare             | Foliage                            |
| <i>Trialeurodes vaporariorum</i> (Westwood), greenhouse whitefly                 | Invader | Central America, Mexico, Caribbean |            |                     | Periodic         | Foliage                            |
| <b>Family Aphididae - aphids</b>                                                 |         |                                    |            |                     |                  |                                    |
| <i>Acyrtosiphon kondoi</i> Shinji, blue alfalfa aphid                            | Invader | Asia                               |            | 1950-present        | Rare             | Blossom, fruit, stem/vine, foliage |
| <i>Acyrtosiphon pisum</i> (Harris), pea aphid                                    | Invader | Europe                             |            | 1850-1900           | Periodic         | Blossom, fruit, stem/vine, foliage |
| <i>Aphis craccivora</i> Koch, cowpea aphid                                       | Invader | Africa?                            |            | ?                   | Periodic         | Fruit, stem/                       |

|                                                                       | Status   | Origin                                | Host range | Period of detection | Damage frequency | Site damaged                                                |
|-----------------------------------------------------------------------|----------|---------------------------------------|------------|---------------------|------------------|-------------------------------------------------------------|
| <i>Aphis fabae</i> Scopoli, bean aphid                                | Invader  | Europe                                |            | ?                   | Periodic         | vine, foliage                                               |
| <i>Aphis gossypii</i> Glover, melon aphid                             | Invader? | ?                                     |            | ?                   | Frequent         | Foliage                                                     |
| <i>Aphis maidiradicis</i> Forbes, corn root aphid                     | Native   |                                       |            |                     | Rare             | Root/seed/<br>bulb                                          |
| <i>Aphis nasturtii</i> Kaltenbach, buckthorn aphid                    | Invader  | Europe?                               |            | ?                   | Periodic         | Foliage                                                     |
| <i>Aulacorthum solani</i> (Kaltenbach), foxglove aphid                | Invader  | Europe?                               |            | ?                   | Rare             | Foliage                                                     |
| <i>Brachycorynella asparagi</i> (Mordvilko),<br>asparagus aphid       | Invader  | Europe                                |            | 1950-present        | Frequent         | Foliage                                                     |
| <i>Brevicoryne brassicae</i> (L.), cabbage aphid                      | Invader  | Europe?                               |            | Before 1800         | Frequent         | Foliage                                                     |
| <i>Capitophorus elaeagni</i> (del Guercio), artichoke aphid           | Invader  | Europe                                |            | ?                   | Periodic         | Foliage                                                     |
| <i>Cavariella aegopodii</i> Scopoli, willow-carrot aphid              | Invader  | ?                                     |            | ?                   | Frequent         | Foliage                                                     |
| <i>Dysaphis crataegi</i> (Kaltenbach), carrot root aphid              | Invader  | Europe                                |            | ?                   | Rare             | Stem/vine,<br>root/seed/<br>bulb                            |
| <i>Dysaphis foeniculus</i> (Theobald), carrot root aphid              | Invader  | Europe                                |            | ?                   | Rare             | Stem/vine,<br>root/seed/<br>bulb                            |
| <i>Hyadaphis coriandri</i> (Das), coriander aphid                     | Invader  | Europe                                |            | 1950-present        | Rare             | Foliage                                                     |
| <i>Hyadaphis foeniculi</i> (Passerini), honeysuckle aphid             | Invader  | Europe                                |            | 1900-1950           | Rare             | Foliage                                                     |
| <i>Lipaphis erysimi</i> (Kaltenbach), turnip aphid                    | ?        |                                       |            |                     | Periodic         | Foliage                                                     |
| <i>Macrosiphum euphorbiae</i> (Thomas), potato aphid                  | Native   |                                       |            |                     | Frequent         | Stem/vine,<br>foliage                                       |
| <i>Myzus persicae</i> (Sulzer), green peach aphid                     | Invader  | ?                                     |            | ?                   | Frequent         | Foliage                                                     |
| <i>Nasonovia ribisnigri</i> (Mosley), lettuce aphid                   | Invader  | Europe                                |            | 1950-present        | Periodic         | Foliage                                                     |
| <i>Pemphigus betae</i> Doane, sugarbeet root aphid                    | Native   |                                       |            |                     | Rare             | Root/seed/<br>bulb                                          |
| <i>Pemphigus bursarius</i> (L.), lettuce root aphid                   | Invader  | Europe                                |            | ?                   | Periodic         | Root/seed/<br>bulb                                          |
| <i>Pemphigus populivivae</i> Fitch, sugarbeet root aphid              | Native   |                                       |            |                     | Rare             | Root/seed/<br>bulb                                          |
| <i>Rhopalosiphum maidis</i> (Fitch), corn leaf aphid                  | Invader  | Asia?                                 |            | ?                   | Rare             | Blossom,<br>fruit, foliage                                  |
| <i>Rhopalosiphum padi</i> (L.), bird cherry-oat aphid                 | Native   |                                       |            |                     | Periodic         | Foliage                                                     |
| <i>Rhopalosiphum rufiabdominalis</i> (Saaki),<br>rice root aphid      | Invader  | Asia                                  |            | ?                   | Rare             | Root/seed/<br>bulb                                          |
| <i>Smynturoides betae</i> Westwood, bean root aphid                   | Invader  | Europe                                |            | ?                   | Rare             | Root/seed/<br>bulb                                          |
| <b>Family Cicadellidae - leafhoppers</b>                              |          |                                       |            |                     |                  |                                                             |
| <i>Circulifer tenellus</i> (Baker), beet leafhopper                   | Invader  | Europe                                |            | Before 1800         | Frequent         | Foliage                                                     |
| <i>Dalbulus maidis</i> (DeLong & Wolcott),<br>corn leafhopper         | Invader  | Central America,<br>Mexico, Caribbean |            | ?                   | Periodic         | Foliage                                                     |
| <i>Empoasca abrupta</i> DeLong, western potato leafhopper             | Native   |                                       |            |                     | Rare             | Foliage                                                     |
| <i>Empoasca fabae</i> (Harris), potato leafhopper                     | Native   |                                       |            |                     | Periodic         | Foliage                                                     |
| <i>Macrostelus quadrilineatus</i> Forbes, aster leafhopper            | Native   |                                       |            |                     | Frequent         | Foliage                                                     |
| <b>Family Delphacidae - planthoppers</b>                              |          |                                       |            |                     |                  |                                                             |
| <i>Peregrinus maidis</i> (Ashmead), corn delphacid                    | Invader  | Africa                                |            | ?                   | Rare             | Foliage                                                     |
| <b>Family Psyllidae - psyllids</b>                                    |          |                                       |            |                     |                  |                                                             |
| <i>Paratrioza cockerelli</i> (Sulc), potato psyllid                   | Native   |                                       |            | Periodic            | Foliage          |                                                             |
| <b>Order Hymenoptera - Ants and Sawflies</b>                          |          |                                       |            |                     |                  |                                                             |
| <b>Family Argidae - sawflies</b>                                      |          |                                       |            |                     |                  |                                                             |
| <i>Sterictiphora cellularis</i> (Say), sweetpotato sawfly             | Native   |                                       |            |                     | Rare             | Foliage                                                     |
| <b>Family Formicidae - ants</b>                                       |          |                                       |            |                     |                  |                                                             |
| <i>Solenopsis invicta</i> Buren, red imported fire ant                | Invader  | South America                         |            | 1900-1950           | Periodic         | Fruit, stem/<br>vine, foliage,<br>tuber, root/<br>seed/bulb |
| <b>Order Lepidoptera - Caterpillars, Moths and Butterflies</b>        |          |                                       |            |                     |                  |                                                             |
| <b>Family Arctiidae - woollybear caterpillars<br/>and tiger moths</b> |          |                                       |            |                     |                  |                                                             |
| <i>Estigmene acrea</i> (Drury), saltmarsh caterpillar                 | Native   |                                       |            |                     | Periodic         | Foliage                                                     |
| <i>Pyrrharctia isabella</i> (J.E. Smith), banded woollybear           | Native   |                                       |            |                     | Rare             | Foliage                                                     |
| <i>Spilosoma virginica</i> (F.), yellow woollybear                    | Native   |                                       |            |                     | Rare             | Foliage                                                     |

**Appendix continued**



Appendix. (continued)

|                                                                                         | Status   | Origin                             | Host range | Period of detection | Damage frequency | Site damaged                       |
|-----------------------------------------------------------------------------------------|----------|------------------------------------|------------|---------------------|------------------|------------------------------------|
| <b>Order Lepidoptera - Caterpillars, Moths and Butterflies (continued)</b>              |          |                                    |            |                     |                  |                                    |
| <b>Family Gelechiidae - leafminer moths</b>                                             |          |                                    |            |                     |                  |                                    |
| <i>Keiferia lycopersicella</i> (Walsingham), tomato pinworm                             | Invader  | Central America, Mexico, Caribbean |            | 1900-1950           | Frequent         | Fruit, foliage                     |
| <i>Phthorimaea operculella</i> (Zeller), potato tuberworm                               | Native   |                                    |            |                     | Periodic         | Foliage, tuber                     |
| <i>Tildenia inconspicuell</i> (Murtfeldt), eggplant leafminer                           | Native   |                                    |            |                     | Rare             | Foliage                            |
| <b>Family Hesperidae - skipper butterflies</b>                                          |          |                                    |            |                     |                  |                                    |
| <i>Urbanus proteus</i> (L.), bean leafroller                                            | Native   |                                    |            |                     | Periodic         | Foliage                            |
| <b>Family Lycaenidae - hairstreak butterflies</b>                                       |          |                                    |            |                     |                  |                                    |
| <i>Strymon melinus</i> (Hübner), cotton square borer                                    | Native   |                                    |            |                     | Rare             | Fruit, foliage                     |
| <b>Family Lyonetiidae - lyonetiid moths</b>                                             |          |                                    |            |                     |                  |                                    |
| <i>Bedellia orchilella</i> Walsingham, sweetpotato leafminer                            | Invader  | Asia                               |            | ?                   | Rare             | Foliage                            |
| <i>Bedellia sommulentella</i> (Zeller), morningglory leafminer                          | Invader  | Asia                               |            | ?                   | Rare             | Foliage                            |
| <b>Family Noctuidae - armyworms, cutworms, loopers, stalk borers, and noctuid moths</b> |          |                                    |            |                     |                  |                                    |
| <i>Agrotis ipsilon</i> (Hufnagel), black cutworm                                        | Native   |                                    |            |                     | Periodic         | Foliage                            |
| <i>Agrotis orthogonia</i> Morrison, pale western cutworm                                | Native   |                                    |            |                     | Rare             | Stem/vine                          |
| <i>Agrotis subterranea</i> (F.), granulate cutworm                                      | Native   |                                    |            |                     | Periodic         | Stem/vine, foliage                 |
| <i>Anagrapha falcifera</i> (Kirby), celery looper                                       | Native   |                                    |            |                     | Rare             | Foliage                            |
| <i>Anomis erosa</i> Hübner, okra caterpillar                                            | Invader? | ?                                  |            | ?                   | Rare             | Foliage                            |
| <i>Apamea devastator</i> (Brace), glassy cutworm                                        | Native   |                                    |            |                     | Rare             | Stem/vine, root/seed/bulb          |
| <i>Autographa californica</i> (Speyer), alfalfa looper                                  | Native   |                                    |            |                     | Periodic         | Foliage                            |
| <i>Autographa precationis</i> (Guenée), plantain looper                                 | Native   |                                    |            |                     | Rare             | Foliage                            |
| <i>Autoplusia egea</i> (Guenée), bean leafskeletonizer                                  | Native   |                                    |            |                     | Rare             | Foliage                            |
| <i>Dicestra trifolii</i> (Hufnagel), clover cutworm                                     | Native   |                                    |            |                     | Periodic         | Foliage                            |
| <i>Euxoa auxiliaris</i> (Grote), army cutworm                                           | Native   |                                    |            |                     | Rare             | Stem/vine, foliage                 |
| <i>Euxoa messoria</i> (Harris), darksided cutworm                                       | Native   |                                    |            |                     | Rare             | Foliage                            |
| <i>Euxoa ochrogaster</i> (Guenée), redbacked cutworm                                    | Native   |                                    |            |                     | Periodic         | Stem/vine, foliage                 |
| <i>Feltia jaculifera</i> (Guenée), dingy cutworm                                        | Native   |                                    |            |                     | Rare             | Foliage                            |
| <i>Feltia subgothica</i> (Haworth), dingy cutworm                                       | Native   |                                    |            |                     | Rare             | Foliage                            |
| <i>Helicoverpa zea</i> (Boddie), corn earworm                                           | Native   |                                    |            |                     | Frequent         | Fruit, foliage                     |
| <i>Heliothis virescens</i> (F.), tobacco budworm                                        | Native   |                                    |            |                     | Rare             | Blossom, fruit, stem/vine          |
| <i>Hydraecia immanis</i> (Guenée), hop vine borer                                       | Native   |                                    |            |                     | Periodic         | Stem/vine, foliage, root/seed/bulb |
| <i>Hydraecia micacea</i> (Esper), potato stem borer                                     | Invader  | Europe                             |            | 1900-1950           | Periodic         | Stem/vine, foliage, root/seed/bulb |
| <i>Loxagrotis albicosta</i> (Smith), western bean cutworm                               | Native   |                                    |            |                     | Rare             | Fruit                              |
| <i>Mamestra configurata</i> Walker, bertha armyworm                                     | Native   |                                    |            |                     | Periodic         | Foliage                            |
| <i>Megalographa biloba</i> (Stephens), bilobed looper                                   | Native   |                                    |            |                     | Rare             | Foliage                            |
| <i>Melanchnra picta</i> (Harris), zebra caterpillar                                     | Native   |                                    |            |                     | Rare             | Foliage                            |
| <i>Mocis latipes</i> Guenée, striped grass looper                                       | Native   |                                    |            |                     | Rare             | Foliage                            |
| <i>Nephelodes minians</i> Guenée, bronzed cutworm                                       | Native   |                                    |            |                     | Rare             | Foliage                            |
| <i>Papaipema nebris</i> (Guenée), stalk borer                                           | Native   |                                    |            |                     | Rare             | stem/vine                          |
| <i>Peridroma saucia</i> (Hübner), variegated cutworm                                    | Invader  | Europe?                            |            | 1800-1850           | Periodic         | Stem/vine, foliage                 |
| <i>Plathypena scabra</i> (F.), green cloverworm                                         | Native   |                                    |            |                     | Rare             | Foliage                            |
| <i>Pseudaletia unipunctata</i> (Haworth), armyworm                                      | Native   |                                    |            |                     | Periodic         | Foliage                            |
| <i>Pseudoplusia includens</i> (Walker), soybean looper                                  | Native   |                                    |            |                     | Rare             | Fruit, foliage                     |
| <i>Spodoptera dolichos</i> (F.), sweetpotato armyworm                                   | Native   |                                    |            |                     | Rare             | Stem/vine, foliage                 |
| <i>Spodoptera eridania</i> (Stoll), southern armyworm                                   | Native   |                                    |            |                     | Frequent         | Fruit, foliage, tuber              |
| <i>Spodoptera exigua</i> (Hübner), beet armyworm                                        | Invader  | Asia                               |            | 1850-1900           | Frequent         | Foliage                            |
| <i>Spodoptera frugiperda</i> (J.E. Smith), fall armyworm                                | Native   |                                    |            |                     | Frequent         | Fruit, foliage                     |

Downloaded from https://academic.oup.com/ae/article/48/1/20/2474628 by guest on 24 April 2024

|                                                                                   | Status   | Origin                             | Host range | Period of detection | Damage frequency | Site damaged                       |
|-----------------------------------------------------------------------------------|----------|------------------------------------|------------|---------------------|------------------|------------------------------------|
| <i>Spodoptera latifascia</i> (Walker), velvet armyworm                            | Native   |                                    |            |                     | Rare             | Stem/vine, foliage                 |
| <i>Spodoptera ornithogalli</i> (Guenée), yellowstriped armyworm                   | Native   |                                    |            |                     | Periodic         | Fruit, foliage                     |
| <i>Spodoptera praefica</i> (Grote), western yellowstriped armyworm                | Native   |                                    |            |                     | Periodic         | Fruit, foliage                     |
| <i>Trichoplusia ni</i> (Hübner), cabbage looper                                   | ?        |                                    |            |                     | Frequent         | Foliage                            |
| <i>Xestia adela</i> Franclemont, spotted cutworm                                  | Invader  | Europe                             |            | ?                   | Periodic         | Fruit, stem/vine, foliage          |
| <i>Xestia dolosa</i> Franclemont, spotted cutworm                                 | Invader  | Europe                             |            | ?                   | Periodic         | Fruit, stem/vine, foliage          |
| <b>Family Oecophoridae - oecophorid moths</b>                                     |          |                                    |            |                     |                  |                                    |
| <i>Depressaria pastinacella</i> (Duponchel), parsnip webworm                      | Invader  | Europe                             |            | 1850-1900           | Rare             | Blossom                            |
| <b>Family Papilionidae - celeryworms and swallowtail butterflies</b>              |          |                                    |            |                     |                  |                                    |
| <i>Papilio polyxenes</i> F., black swallowtail                                    | Native   |                                    |            |                     | Rare             | Foliage                            |
| <i>Papilio zelicaon</i> Lucas, anise swallowtail                                  | Native   |                                    |            |                     | Rare             | Foliage                            |
| <b>Family Pieridae - cabbageworms, white, and sulfur butterflies</b>              |          |                                    |            |                     |                  |                                    |
| <i>Ascia monuste</i> (L.), southern white                                         | Native   |                                    |            |                     | Rare             | Foliage                            |
| <i>Colias eurytheme</i> Boisduval, alfalfa caterpillar                            | Native   |                                    |            |                     | Rare             | Foliage                            |
| <i>Pieris napi</i> (L.), mustard white                                            | Native   |                                    |            |                     | Rare             | Foliage                            |
| <i>Pieris rapae</i> (L.), imported cabbageworm                                    | Invader  | Europe                             |            | 1850-1900           | Frequent         | Foliage                            |
| <i>Pontia protodice</i> (Boisduval & LeConte), southern cabbageworm               | Native   |                                    |            |                     | Rare             | Fruit, foliage                     |
| <b>Family Pterophoridae - plume moths</b>                                         |          |                                    |            |                     |                  |                                    |
| <i>Platyptilia carduidactyla</i> (Riley), artichoke plume moth                    | Native   |                                    |            |                     | Frequent         | Blossom, fruit, stem/vine, foliage |
| <b>Family Pyralidae - borers, budworms, leaf tiers, webworms, and snout moths</b> |          |                                    |            |                     |                  |                                    |
| <i>Achyra rantalis</i> (Guenée), garden webworm                                   | Native   |                                    |            |                     | Rare             | Foliage                            |
| <i>Crambus</i> and others, sod and root webworms                                  | Native   |                                    |            |                     | Rare             | Stem/vine, foliage, root/seed/bulb |
| <i>Diaphania hyalinata</i> (L.), melonworm                                        | Native   |                                    |            |                     | Periodic         | Fruit, foliage                     |
| <i>Diaphania nitidalis</i> (Stoll), pickleworm                                    | Native   |                                    |            |                     | Frequent         | Blossom, fruit                     |
| <i>Diatraea crambidoides</i> (Grote), southern cornstalk borer                    | Native   |                                    |            |                     |                  | Stem/vine, foliage                 |
| <i>Diatraea grandiosella</i> Dyar, southern corn borer                            | Invader  | Central America, Mexico, Caribbean |            | 1850-1900           | Rare             | Fruit, stem/vine, foliage          |
| <i>Diatraea saccharalis</i> (F.), sugarcane borer                                 | Invader  | Central America, Mexico, Caribbean |            | 1850-1900           | Rare             | Fruit, stem/vine, foliage          |
| <i>Elasmopalpus lignosellus</i> (Zeller), lesser cornstalk borer                  | Native   |                                    |            |                     | Rare             | stem/vine                          |
| <i>Etiella zinckenella</i> (Treitschke), limabean pod borer                       | Invader  | ?                                  |            | 1850-1900           | Rare             | Fruit                              |
| <i>Evergestis pallidata</i> (Hufnagel), purplebacked cabbageworm                  | Invader  | Europe                             |            | 1850-1900           | Rare             | Stem/vine, foliage, Root/seed/bulb |
| <i>Evergestis rimosalis</i> (Guenée),                                             | Native   |                                    |            |                     | Periodic         | Foliage                            |
| <i>Hellula phidilealis</i> (Walker), cabbage budworm                              | Invader? | Central America, Mexico, Caribbean |            | ?                   | Rare             | Stem/vine                          |
| cross-striped cabbageworm                                                         |          |                                    |            |                     |                  |                                    |
| <i>Hellula rogatalis</i> (Hulst), cabbage webworm                                 | Native   |                                    |            |                     | Rare             | Foliage                            |
| <i>Hellula undalis</i> (F.), oriental cabbage webworm                             | Invader? | ?                                  |            | ?                   | Rare             | Foliage                            |
| <i>Herpetogramma bipunctalis</i> (F.), southern beet webworm                      | ?        |                                    |            |                     | Rare             | Foliage                            |
| <i>Hymenia perspectalis</i> (Hübner), spotted beet webworm                        | ?        |                                    |            |                     | Rare             | Foliage                            |
| <i>Loxostege cereralis</i> (Zeller), alfalfa webworm                              | Native   |                                    |            |                     | Rare             | Foliage                            |
| <i>Loxostege sticticalis</i> (L.), beet webworm                                   | Invader  | Europe                             |            | ?                   | Rare             | Foliage                            |
| <i>Omphisa anastomosalis</i> (Guenée), sweetpotato vine borer                     | Invader  | Asia                               |            | 1850-1900           | Rare             | Stem/vine, tuber                   |
| <i>Ostrinia nubilalis</i> (Hübner), European corn borer                           | Invader  | Europe                             |            | 1900-1950           | Frequent         | Blossom, fruit, stem/              |

Appendix continued

Appendix 1. (continued)

|                                                                              | Status  | Origin        | Host range | Period of detection | Damage frequency | Site damaged                                       |
|------------------------------------------------------------------------------|---------|---------------|------------|---------------------|------------------|----------------------------------------------------|
| <b>Order Lepidoptera - Caterpillars, Moths and Butterflies (continued)</b>   |         |               |            |                     |                  |                                                    |
| <i>Plutella xylostella</i> (L.), diamondback moth                            | Invader | Europe        |            | 1850-1900           | Frequent         | vine, foliage                                      |
| <i>Spoladea recurvalis</i> (F.), Hawaiian beet webworm                       | Invader | ?             |            | ?                   | Rare             | Foliage                                            |
| <i>Udea profundalis</i> (Packard), false celery leaf-tier                    | Native  |               |            |                     | Rare             | Stem/vine, foliage                                 |
| <i>Udea rubigalis</i> (Guenée), celery leaf-tier                             | Native  |               |            |                     | Rare             | Stem/vine, foliage                                 |
| <b>Family Sesiidae - vine borers and clearwing moths</b>                     |         |               |            |                     |                  |                                                    |
| <i>Melittia calabaza</i> Duckworth & Eichlin, southwestern squash vine borer | Native  |               |            |                     | Rare             | Stem/vine                                          |
| <i>Melittia cucurbitae</i> (Harris), squash vine borer                       | Native  |               |            |                     | Frequent         | Stem/vine                                          |
| <b>Family Sphingidae - hornworms and sphinx moths</b>                        |         |               |            |                     |                  |                                                    |
| <i>Agrilus cingulatus</i> (F.), sweetpotato hornworm                         | Native  |               |            |                     | Rare             | Foliage                                            |
| <i>Hyles lineata</i> (F.), whitelined sphinx                                 | Native  |               |            |                     | Rare             | Foliage                                            |
| <i>Manduca quinquemaculata</i> (Haworth), tomato hornworm                    | Native  |               |            |                     | Periodic         | Fruit, foliage                                     |
| <i>Manduca sexta</i> (L.), tobacco hornworm                                  | Native  |               |            |                     | Periodic         | Fruit, foliage                                     |
| <b>Family Tortricidae - leafroller moths</b>                                 |         |               |            |                     |                  |                                                    |
| <i>Cydia nigricana</i> (F.), pea moth                                        | Invader | Europe        |            | 1850-1900           | Rare             | Fruit                                              |
| <b>Order Orthoptera - Grasshoppers and Crickets</b>                          |         |               |            |                     |                  |                                                    |
| <b>Family Acrididae - grasshoppers</b>                                       |         |               |            |                     |                  |                                                    |
| <i>Melanoplus bivittatus</i> (Say), two-striped grasshopper                  | Native  |               |            |                     | Periodic         | Foliage                                            |
| <i>Melanoplus differentialis</i> (Thomas), differential grasshopper          | Native  |               |            |                     | Periodic         | Foliage                                            |
| <i>Melanoplus femurrubrum</i> (De Geer), redlegged grasshopper               | Native  |               |            |                     | Rare             | Foliage                                            |
| <i>Melanoplus propinquus</i> Scudder, southern redlegged grasshopper         | Native  |               |            |                     | Rare             | Foliage                                            |
| <i>Melanoplus sanguinipes</i> (F.), migratory grasshopper                    | Native  |               |            |                     | Periodic         | Foliage                                            |
| <i>Romalea microptera</i> (Beauvois), eastern lubber grasshopper             | Native  |               |            |                     | Periodic         | Foliage                                            |
| <i>Schistocerca americana</i> (Drury), American grasshopper                  | Native  |               |            |                     | Rare             | Foliage                                            |
| <b>Family Gryllidae - field crickets</b>                                     |         |               |            |                     |                  |                                                    |
| <i>Gryllus pennsylvanicus</i> Burmeister, fall field cricket                 | Native  |               |            |                     | Rare             | Blossom, fruit, stem/vine, foliage, root/seed/bulb |
| <i>Gryllus rubens</i> Scudder, southeastern field cricket                    | Native  |               |            |                     | Rare             | Blossom, fruit, stem/vine, foliage, root/seed/bulb |
| <i>Gryllus veletis</i> (Alexander & Bigelow), spring field cricket           | Native  |               |            |                     | Rare             | Blossom, fruit, stem/                              |
| <b>Family Gryllotalpidae - mole crickets</b>                                 |         |               |            |                     |                  |                                                    |
| <i>Scapteriscus abbreviatus</i> Scudder, shortwinged mole cricket            | Invader | South America |            | 1850-1900           | Rare             | vine, foliage, root/seed/bulb                      |
| <i>Scapteriscus borellii</i> Giglio-Tos, southern mole cricket               | Invader | South America |            | 1850-1900           | Rare             | Stem/vine, foliage, tuber, root/seed/bulb          |
| <i>Scapteriscus vicinus</i> Scudder, tawny mole cricket                      | Invader | South America |            | 1850-1900           | Rare             | Stem/vine,                                         |

Downloaded from https://academic.oup.com/ae/article/48/1/20/2474628 by guest on 24 April 2024

|                                                                          | Status  | Origin | Host range | Period of detection | Damage frequency | Site damaged                   |
|--------------------------------------------------------------------------|---------|--------|------------|---------------------|------------------|--------------------------------|
| <b>Order Orthoptera - Grasshoppers and Crickets (continued)</b>          |         |        |            |                     |                  |                                |
| <b>Family Tettigoniidae - shield-backed crickets</b>                     |         |        |            |                     |                  | foliage, tuber, root/seed/bulb |
| <i>Anabrus simplex</i> Haldeman, Mormon cricket                          | Native  |        |            |                     | Rare             | Foliage                        |
| <i>Peranabrus scabricollis</i> (Thomas), coulee cricket                  | Native  |        |            |                     | Rare             | Foliage                        |
| <b>Order Thysanoptera - Thrips</b>                                       |         |        |            |                     |                  |                                |
| <i>Anaphothrips obscurus</i> (Müller), grass thrips                      | Native  |        |            |                     | Rare             | Foliage                        |
| <i>Caliothrips fasciatus</i> (Pergande), bean thrips                     | Native  |        |            |                     | Rare             | Foliage                        |
| <i>Frankliniella fusca</i> (Hinds), tobacco thrips                       | Native  |        |            |                     | Frequent         | Blossom, foliage               |
| <i>Frankliniella occidentalis</i> (Pergande), western flower thrips      | Native  |        |            |                     | Frequent         | Blossom                        |
| <i>Thrips palmi</i> Karny, melon thrips                                  | Invader | Asia   |            | 1950-present        | Frequent         | Blossom, fruit, foliage        |
| <i>Thrips tabaci</i> Lindeman, onion thrips                              | Invader | Asia   |            | 1850-1900           | Frequent         | Fruit, foliage                 |
| <b>Other Invertebrate Pests</b>                                          |         |        |            |                     |                  |                                |
| <b>Class Acari - mites</b>                                               |         |        |            |                     |                  |                                |
| <i>Aculops lycopersici</i> (Masse), tomato russet mite                   | Invader | ?      |            | 1800-1850           | Periodic         | Stem/vine, foliage             |
| <i>Oligonychus pratensis</i> (Banks), Banks grass mite                   | Native  |        |            |                     | Rare             | Foliage                        |
| <i>Polyphagotarsonemus latus</i> (Banks), broad mite                     | Invader | Asia   |            | ?                   | Periodic         | Blossom, fruit, foliage        |
| <i>Rhizoglyphus echinopus</i> (Fumouze & Robin), bulb mite               | Invader | ?      |            | ?                   | Rare             | Root/seed/bulb                 |
| <i>Rhizoglyphus robini</i> Claparede, bulb mite                          | Invader | ?      |            | ?                   | Rare             | Root/seed/bulb                 |
| <i>Tetranychus tumidus</i> Banks, tumid spider mite                      | Native  |        |            |                     | Rare             | Foliage                        |
| <i>Tetranychus turkestanii</i> Ugarov & Nikolski, strawberry spider mite | Native  | Asia   |            |                     | Rare             | Foliage                        |
| <i>Tetranychus urticae</i> Koch, twospotted spider mite                  | Invader | Europe |            | 1850-1900           | Frequent         | Foliage                        |
| <b>Class Collembola - springtails</b>                                    |         |        |            |                     |                  |                                |
| <i>Bourletiella hortensis</i> Fitch, garden springtail                   | Invader | Europe |            | ?                   | Rare             | Stem/vine, foliage             |
| <b>Class Diplopoda - millipedes</b>                                      |         |        |            |                     |                  |                                |
| <i>Oxidus gracilis</i> Koch, garden millipede                            | Invader | ?      |            | ?                   | Rare             | Fruit, stem/vine, tuber        |
| <b>Class Isopoda - pillbugs and sowbugs</b>                              |         |        |            |                     |                  |                                |
| <i>Armadillidium vulgare</i> (Latreille), common pillbug                 | Invader | Europe |            | ?                   | Rare             | Fruit, stem/vine, foliage      |
| <i>Porcellio scaber</i> Latreille, dooryard sowbug                       | Invader | Europe |            | ?                   | Rare             | Fruit, stem/vine, foliage      |
| <b>Class Gastropoda - slugs and snails</b>                               |         |        |            |                     |                  |                                |
| <i>Arionater rufus</i> (L.), black slug                                  | Invader | Europe |            | 1850-1900           | Rare             | Foliage                        |
| <i>Cepaea</i> , <i>Helix</i> , <i>Rumina</i> spp. and others, snails     |         |        |            |                     |                  |                                |
| <i>Cepaea hortensis</i> (Müller), white-lipped snail                     | Invader | Europe |            | 1850-1900           | Rare             | Foliage                        |
| <i>Cepaea nemoralis</i> (L.), brown-lipped snail                         | Invader | Europe |            | 1850-1900           | Rare             | Foliage                        |
| <i>Deroceras</i> , <i>Limax</i> , <i>Milax</i> spp. and others, slugs    |         |        |            |                     |                  |                                |
| <i>Deroceras laeve</i> (Müller), marsh slug                              | Native  |        |            |                     | Rare             | Foliage                        |
| <i>Deroceras reticulatum</i> (Müller), gray garden slug                  | Invader | Europe |            | 1850-1900           | Periodic         | Root/seed/bulb                 |
| <i>Helix aperta</i> Born, singing snail                                  | Invader | Europe |            | 1850-1900           | Rare             | Foliage                        |
| <i>Helix aspera</i> Müller, brown garden snail                           | Invader | Europe |            | 1850-1900           | Periodic         | Foliage                        |
| <i>Helix pomatia</i> L., Roman snail                                     | Invader | Europe |            | 1850-1900           | Rare             | Foliage                        |
| <i>Limax flavus</i> (L.), tawny garden slug                              | Invader | Europe |            | 1850-1900           | Periodic         | Foliage                        |
| <i>Limax maximus</i> L., spotted garden slug                             | Invader | Europe |            | 1850-1900           | Periodic         | Foliage                        |
| <i>Milax gagates</i> (Draparnand), greenhouse slug                       | Invader | Europe |            | 1850-1900           | Periodic         | Foliage                        |
| <i>Otala lactea</i> (Müller), milk snail                                 | Invader | Europe |            | ?                   | Rare             | Foliage                        |
| <i>Rumina decollata</i> (L.), decollate snail                            | Invader | Europe |            | ?                   | Rare             | Foliage                        |
| <i>Theba pisana</i> (Müller), white garden snail                         | Invader | Europe |            | 1900-1950           | Rare             | Foliage                        |
| <b>Class Symphyla - symphylans</b>                                       |         |        |            |                     |                  |                                |
| <i>Scutigera immaculata</i> (Newport), garden symphylan                  | Invader | Europe |            | ?                   | Periodic         | Root/seed/bulb                 |
